# Supplementary material for: Prevalence and Risk Factors of Lungworm Infection in Small Ruminants in Selected Districts of Wolaita Zone, Southern Ethiopia
Source: J Parasitol Res. 2024 Apr 10;2024:6303598. doi: 10.1155/2024/6303598 (PMC11023728; doi:10.1155/2024/6303598)
Supplement: Supplementary Materials — The entire required data are available and recorded in the format of text we have attached as supplementary information files (as Supplementary data.Txt). [file 6303598.f1.txt]

SerNo	agroecology0highland1midla	Species0ovine1caprine	Sex0female1male	Age0young1adult	BCS0poor1medium2good	mgt0ext1semiint	season0dry1wet	weredas0sodozuria1damotga	Result1positive0negative	DF0abscent1present	PR0abscent1present	MC0abscent1present	Mixed0DfilarialandPrufe
1	hig land	ovine	female	young	poor	semi-intesnsive	wet	sodo zuria	positive	present	absent	absent	D. filarial and P. rufescens
2	hig land	ovine	male	young	medium	extensive	wet	sodo zuria	negative	absent	absent	absent	D. filarial and P. rufescens
3	hig land	ovine	female	young	poor	extensive	dry	sodo zuria	negative	absent	absent	absent	D. filarial and P. rufescens
4	hig land	ovine	male	adult	poor	extensive	dry	sodo zuria	positive	present	absent	absent	D. filarial and P. rufescens
5	hig land	ovine	female	young	medium	extensive	wet	sodo zuria	negative	absent	absent	absent	D. filarial and P. rufescens
6	hig land	ovine	female	young	poor	extensive	wet	sodo zuria	negative	absent	absent	absent	D. filarial and P. rufescens
7	hig land	ovine	female	adult	good	semi-intesnsive	wet	sodo zuria	positive	present	absent	absent	D. filarial and P. rufescens
8	hig land	ovine	male	young	poor	extensive	dry	sodo zuria	negative	absent	absent	absent	D. filarial and P. rufescens
9	hig land	ovine	female	adult	good	semi-intesnsive	dry	sodo zuria	negative	absent	absent	absent	D. filarial and P. rufescens
10	hig land	ovine	female	young	poor	extensive	wet	sodo zuria	positive	present	absent	absent	D. filarial and P. rufescens
11	hig land	ovine	male	adult	medium	extensive	dry	sodo zuria	negative	absent	absent	absent	D. filarial and P. rufescens
12	hig land	ovine	male	adult	poor	extensive	wet	sodo zuria	negative	absent	absent	absent	D. filarial and P. rufescens
13	hig land	ovine	female	adult	medium	extensive	dry	sodo zuria	positive	present	absent	absent	D. filarial and P. rufescens
14	hig land	ovine	female	adult	poor	semi-intesnsive	wet	sodo zuria	positive	present	absent	absent	D. filarial and P. rufescens
15	hig land	ovine	female	adult	poor	extensive	dry	sodo zuria	negative	absent	absent	absent	D. filarial and P. rufescens
16	hig land	ovine	female	adult	poor	extensive	wet	sodo zuria	negative	absent	absent	absent	D. filarial and P. rufescens
17	hig land	caprine	male	young	good	extensive	wet	sodo zuria	positive	present	absent	absent	D. filarial and P. rufescens
18	hig land	caprine	female	young	poor	extensive	wet	sodo zuria	negative	absent	absent	absent	D. filarial and P. rufescens
19	hig land	caprine	female	adult	poor	extensive	wet	sodo zuria	negative	absent	absent	absent	D. filarial and P. rufescens
20	hig land	caprine	female	young	poor	semi-intesnsive	dry	sodo zuria	positive	present	absent	absent	D. filarial and P. rufescens
21	hig land	ovine	male	young	poor	extensive	wet	sodo zuria	negative	absent	absent	absent	D. filarial and P. rufescens
22	hig land	ovine	female	adult	medium	extensive	wet	sodo zuria	positive	present	absent	absent	D. filarial and P. rufescens
23	hig land	ovine	female	adult	poor	semi-intesnsive	dry	sodo zuria	negative	absent	absent	absent	D. filarial and P. rufescens
24	hig land	ovine	male	young	good	extensive	wet	sodo zuria	negative	absent	absent	absent	D. filarial and P. rufescens
25	hig land	ovine	female	young	poor	semi-intesnsive	wet	sodo zuria	positive	present	absent	absent	D. filarial and P. rufescens
26	hig land	caprine	female	adult	good	extensive	dry	sodo zuria	negative	absent	absent	absent	D. filarial and P. rufescens
27	hig land	caprine	female	young	poor	extensive	wet	sodo zuria	negative	absent	absent	absent	D. filarial and P. rufescens
28	hig land	caprine	male	young	poor	extensive	wet	sodo zuria	negative	absent	absent	absent	D. filarial and P. rufescens
29	hig land	caprine	male	adult	medium	semi-intesnsive	wet	sodo zuria	negative	absent	absent	absent	D. filarial and P. rufescens
30	hig land	caprine	male	young	medium	extensive	wet	sodo zuria	negative	absent	absent	absent	D. filarial and P. rufescens
31	hig land	ovine	female	adult	poor	semi-intesnsive	dry	sodo zuria	positive	present	absent	absent	D. filarial and P. rufescens
32	hig land	ovine	female	adult	good	extensive	wet	sodo zuria	negative	absent	absent	absent	D. filarial and P. rufescens
33	hig land	ovine	female	adult	medium	extensive	dry	sodo zuria	positive	present	absent	absent	D. filarial and P. rufescens
34	hig land	ovine	female	adult	poor	semi-intesnsive	wet	sodo zuria	negative	absent	absent	absent	D. filarial and P. rufescens
35	hig land	ovine	female	young	poor	semi-intesnsive	dry	sodo zuria	negative	absent	absent	absent	D. filarial and P. rufescens
36	hig land	ovine	male	young	good	semi-intesnsive	wet	sodo zuria	negative	absent	absent	absent	D. filarial and P. rufescens
37	hig land	ovine	female	adult	medium	semi-intesnsive	dry	sodo zuria	positive	present	absent	absent	D. filarial and P. rufescens
38	hig land	ovine	female	adult	medium	extensive	wet	sodo zuria	negative	absent	absent	absent	D. filarial and P. rufescens
39	hig land	ovine	female	young	good	semi-intesnsive	dry	sodo zuria	positive	present	absent	absent	D. filarial and P. rufescens
40	hig land	ovine	female	young	medium	semi-intesnsive	wet	sodo zuria	negative	absent	absent	absent	D. filarial and P. rufescens
41	hig land	ovine	male	young	medium	extensive	dry	sodo zuria	negative	absent	absent	absent	D. filarial and P. rufescens
42	hig land	ovine	female	young	medium	semi-intesnsive	wet	sodo zuria	positive	present	absent	absent	D. filarial and P. rufescens
43	hig land	ovine	female	young	good	extensive	dry	sodo zuria	negative	absent	absent	absent	D. filarial and P. rufescens
44	hig land	ovine	female	adult	medium	semi-intesnsive	wet	sodo zuria	positive	present	absent	absent	D. filarial and P. rufescens
45	hig land	ovine	female	adult	poor	semi-intesnsive	wet	sodo zuria	negative	absent	absent	absent	D. filarial and P. rufescens
46	hig land	ovine	female	young	medium	extensive	dry	sodo zuria	negative	absent	absent	absent	D. filarial and P. rufescens
47	hig land	ovine	female	adult	good	extensive	wet	sodo zuria	negative	absent	absent	absent	D. filarial and P. rufescens
48	hig land	ovine	female	adult	medium	semi-intesnsive	wet	sodo zuria	positive	present	absent	absent	D. filarial and P. rufescens
49	hig land	ovine	female	young	medium	extensive	dry	sodo zuria	negative	absent	absent	absent	D. filarial and P. rufescens
50	hig land	ovine	male	young	medium	semi-intesnsive	wet	sodo zuria	positive	present	absent	absent	D. filarial and P. rufescens
51	hig land	caprine	male	adult	poor	extensive	wet	sodo zuria	negative	absent	absent	absent	D. filarial and P. rufescens
52	hig land	caprine	male	adult	poor	semi-intesnsive	dry	sodo zuria	positive	present	absent	absent	D. filarial and P. rufescens
53	hig land	caprine	female	young	medium	semi-intesnsive	wet	sodo zuria	positive	present	absent	absent	D. filarial and P. rufescens
54	hig land	caprine	female	adult	good	extensive	wet	sodo zuria	negative	absent	absent	absent	D. filarial and P. rufescens
55	hig land	caprine	female	young	poor	extensive	dry	sodo zuria	positive	present	absent	absent	D. filarial and P. rufescens
56	hig land	caprine	male	adult	medium	semi-intesnsive	wet	sodo zuria	negative	absent	absent	absent	D. filarial and P. rufescens
57	hig land	caprine	female	young	medium	semi-intesnsive	wet	sodo zuria	positive	present	absent	absent	D. filarial and P. rufescens
58	hig land	caprine	male	adult	medium	semi-intesnsive	dry	sodo zuria	positive	absent	absent	present	D. filarial and P. rufescens
59	hig land	caprine	female	adult	medium	extensive	wet	sodo zuria	negative	absent	absent	absent	D. filarial and P. rufescens
60	hig land	caprine	male	young	poor	semi-intesnsive	wet	sodo zuria	positive	present	absent	absent	D. filarial and P. rufescens
61	hig land	caprine	female	adult	medium	extensive	dry	sodo zuria	negative	absent	absent	absent	D. filarial and P. rufescens
62	hig land	ovine	female	adult	medium	extensive	wet	sodo zuria	positive	present	absent	absent	D. filarial and P. rufescens
63	hig land	ovine	female	young	poor	semi-intesnsive	dry	sodo zuria	positive	absent	present	absent	D. filarial and P. rufescens
64	hig land	ovine	female	adult	poor	extensive	wet	sodo zuria	negative	absent	absent	absent	D. filarial and P. rufescens
65	hig land	ovine	female	young	medium	semi-intesnsive	dry	sodo zuria	negative	absent	absent	absent	D. filarial and P. rufescens
66	hig land	ovine	female	adult	poor	semi-intesnsive	wet	sodo zuria	negative	absent	absent	absent	D. filarial and P. rufescens
67	hig land	ovine	female	young	medium	semi-intesnsive	dry	sodo zuria	positive	present	absent	absent	D. filarial and P. rufescens
68	hig land	ovine	male	adult	good	extensive	wet	sodo zuria	negative	absent	absent	absent	D. filarial and P. rufescens
69	hig land	ovine	female	adult	poor	semi-intesnsive	dry	sodo zuria	negative	absent	absent	absent	D. filarial and P. rufescens
70	hig land	ovine	female	adult	medium	semi-intesnsive	wet	sodo zuria	negative	absent	absent	absent	D. filarial and P. rufescens
71	hig land	ovine	female	young	good	semi-intesnsive	wet	sodo zuria	positive	present	absent	absent	D. filarial and P. rufescens
72	hig land	ovine	male	adult	poor	semi-intesnsive	dry	sodo zuria	negative	absent	absent	absent	D. filarial and P. rufescens
73	hig land	ovine	male	adult	medium	extensive	wet	sodo zuria	negative	absent	absent	absent	D. filarial and P. rufescens
74	hig land	ovine	female	adult	medium	extensive	dry	sodo zuria	positive	present	absent	absent	D. filarial and P. rufescens
75	hig land	ovine	female	young	poor	semi-intesnsive	dry	sodo zuria	positive	present	absent	absent	D. filarial and P. rufescens
76	hig land	ovine	female	adult	good	extensive	wet	sodo zuria	negative	absent	absent	absent	D. filarial and P. rufescens
77	hig land	ovine	male	adult	medium	semi-intesnsive	dry	sodo zuria	negative	absent	absent	absent	D. filarial and P. rufescens
78	hig land	ovine	male	young	good	semi-intesnsive	wet	sodo zuria	negative	absent	absent	absent	D. filarial and P. rufescens
79	hig land	ovine	male	adult	medium	semi-intesnsive	dry	sodo zuria	positive	present	absent	absent	D. filarial and P. rufescens
80	hig land	ovine	male	adult	poor	extensive	wet	sodo zuria	negative	absent	absent	absent	D. filarial and P. rufescens
81	hig land	caprine	male	young	good	semi-intesnsive	dry	sodo zuria	positive	present	absent	absent	D. filarial and P. rufescens
82	hig land	caprine	female	adult	medium	extensive	wet	sodo zuria	negative	absent	absent	absent	D. filarial and P. rufescens
83	hig land	caprine	female	young	good	semi-intesnsive	wet	sodo zuria	negative	absent	absent	absent	D. filarial and P. rufescens
84	hig land	caprine	female	adult	poor	extensive	dry	sodo zuria	positive	present	absent	absent	D. filarial and P. rufescens
85	hig land	caprine	female	young	medium	semi-intesnsive	wet	sodo zuria	negative	absent	absent	absent	D. filarial and P. rufescens
86	hig land	caprine	female	adult	medium	semi-intesnsive	dry	sodo zuria	positive	present	absent	absent	D. filarial and P. rufescens
87	hig land	caprine	male	adult	medium	extensive	wet	sodo zuria	negative	absent	absent	absent	D. filarial and P. rufescens
88	hig land	caprine	male	adult	poor	semi-intesnsive	wet	sodo zuria	positive	absent	present	absent	D. filarial and P. rufescens
89	hig land	caprine	female	adult	poor	semi-intesnsive	dry	sodo zuria	positive	absent	absent	absent	D. filarial and M. capillaries
90	hig land	caprine	female	young	medium	semi-intesnsive	wet	sodo zuria	negative	absent	absent	absent	D. filarial and P. rufescens
91	hig land	ovine	female	adult	good	extensive	wet	sodo zuria	positive	present	absent	absent	D. filarial and P. rufescens
92	hig land	ovine	female	adult	poor	semi-intesnsive	dry	sodo zuria	positive	present	absent	absent	D. filarial and P. rufescens
93	hig land	ovine	female	adult	medium	extensive	wet	sodo zuria	negative	absent	absent	absent	D. filarial and P. rufescens
94	hig land	ovine	female	adult	medium	extensive	wet	sodo zuria	negative	absent	absent	absent	D. filarial and P. rufescens
95	hig land	ovine	male	adult	poor	semi-intesnsive	dry	sodo zuria	positive	present	absent	absent	D. filarial and P. rufescens
96	hig land	ovine	male	young	poor	extensive	wet	sodo zuria	negative	absent	absent	absent	D. filarial and P. rufescens
97	hig land	ovine	female	adult	medium	semi-intesnsive	dry	sodo zuria	negative	absent	absent	absent	D. filarial and P. rufescens
98	hig land	ovine	female	adult	medium	semi-intesnsive	wet	sodo zuria	positive	present	absent	absent	D. filarial and P. rufescens
99	hig land	ovine	female	young	good	extensive	wet	sodo zuria	positive	present	absent	absent	D. filarial and P. rufescens
100	hig land	ovine	female	adult	poor	semi-intesnsive	dry	sodo zuria	negative	absent	absent	absent	D. filarial and P. rufescens
101	hig land	ovine	female	adult	medium	semi-intesnsive	wet	sodo zuria	negative	absent	absent	absent	D. filarial and P. rufescens
102	hig land	ovine	male	adult	medium	extensive	wet	sodo zuria	positive	present	absent	absent	D. filarial and P. rufescens
103	hig land	ovine	male	adult	good	semi-intesnsive	dry	sodo zuria	negative	absent	absent	absent	D. filarial and P. rufescens
104	hig land	ovine	female	young	poor	semi-intesnsive	wet	sodo zuria	positive	present	absent	absent	D. filarial and P. rufescens
105	hig land	ovine	female	adult	good	extensive	wet	sodo zuria	negative	absent	absent	absent	D. filarial and P. rufescens
106	hig land	ovine	female	adult	medium	semi-intesnsive	dry	sodo zuria	negative	absent	absent	absent	D. filarial and P. rufescens
107	hig land	ovine	female	adult	medium	semi-intesnsive	wet	sodo zuria	positive	present	absent	absent	D. filarial and P. rufescens
108	hig land	ovine	female	adult	poor	extensive	wet	sodo zuria	negative	absent	absent	absent	D. filarial and P. rufescens
109	hig land	ovine	female	young	poor	semi-intesnsive	dry	sodo zuria	positive	present	absent	absent	D. filarial and P. rufescens
110	hig land	ovine	female	adult	good	extensive	wet	sodo zuria	negative	absent	absent	absent	D. filarial and P. rufescens
111	hig land	caprine	female	young	medium	semi-intesnsive	dry	sodo zuria	negative	absent	absent	absent	D. filarial and P. rufescens
112	hig land	caprine	female	young	medium	extensive	wet	sodo zuria	positive	absent	absent	present	D. filarial and P. rufescens
113	hig land	caprine	female	adult	poor	semi-intesnsive	wet	sodo zuria	negative	absent	absent	absent	D. filarial and P. rufescens
114	hig land	caprine	male	adult	medium	semi-intesnsive	dry	sodo zuria	negative	absent	absent	absent	D. filarial and P. rufescens
115	hig land	caprine	male	adult	poor	semi-intesnsive	wet	sodo zuria	negative	absent	absent	absent	D. filarial and P. rufescens
116	hig land	caprine	female	adult	medium	semi-intesnsive	wet	sodo zuria	positive	absent	present	absent	D. filarial and P. rufescens
117	hig land	caprine	female	adult	medium	semi-intesnsive	dry	sodo zuria	negative	absent	absent	absent	D. filarial and P. rufescens
118	hig land	caprine	female	young	poor	semi-intesnsive	wet	sodo zuria	negative	absent	absent	absent	D. filarial and P. rufescens
119	hig land	caprine	female	young	poor	extensive	wet	sodo zuria	positive	absent	present	absent	D. filarial and P. rufescens
120	hig land	caprine	female	adult	medium	semi-intesnsive	dry	sodo zuria	negative	absent	absent	absent	D. filarial and P. rufescens
121	hig land	ovine	female	adult	poor	semi-intesnsive	wet	sodo zuria	positive	present	absent	absent	D. filarial and P. rufescens
122	hig land	ovine	female	adult	good	extensive	wet	sodo zuria	positive	present	absent	absent	D. filarial and P. rufescens
123	hig land	ovine	female	young	medium	semi-intesnsive	dry	sodo zuria	negative	absent	absent	absent	D. filarial and P. rufescens
124	hig land	ovine	male	young	poor	semi-intesnsive	wet	sodo zuria	negative	absent	absent	absent	D. filarial and P. rufescens
125	hig land	ovine	male	adult	medium	extensive	dry	sodo zuria	negative	absent	absent	absent	D. filarial and P. rufescens
126	hig land	ovine	male	adult	medium	semi-intesnsive	wet	sodo zuria	positive	present	absent	absent	D. filarial and P. rufescens
127	hig land	ovine	female	adult	poor	semi-intesnsive	wet	sodo zuria	negative	absent	absent	absent	D. filarial and P. rufescens
128	hig land	ovine	female	adult	medium	extensive	dry	sodo zuria	negative	absent	absent	absent	D. filarial and P. rufescens
129	hig land	ovine	female	young	medium	semi-intesnsive	wet	sodo zuria	positive	present	absent	absent	D. filarial and P. rufescens
130	hig land	ovine	female	young	poor	extensive	wet	sodo zuria	negative	absent	absent	absent	D. filarial and P. rufescens
131	hig land	ovine	female	adult	medium	extensive	dry	sodo zuria	positive	present	absent	absent	D. filarial and P. rufescens
132	hig land	ovine	female	adult	poor	semi-intesnsive	wet	sodo zuria	negative	absent	absent	absent	D. filarial and P. rufescens
133	hig land	ovine	female	young	medium	semi-intesnsive	wet	sodo zuria	negative	absent	absent	absent	D. filarial and P. rufescens
134	hig land	ovine	female	adult	poor	semi-intesnsive	dry	sodo zuria	positive	present	absent	absent	D. filarial and P. rufescens
135	hig land	ovine	male	young	good	semi-intesnsive	wet	sodo zuria	negative	absent	absent	absent	D. filarial and P. rufescens
136	hig land	ovine	male	young	poor	semi-intesnsive	dry	sodo zuria	negative	absent	absent	absent	D. filarial and P. rufescens
137	hig land	ovine	male	adult	medium	extensive	wet	sodo zuria	positive	present	absent	absent	D. filarial and P. rufescens
138	hig land	ovine	female	adult	good	semi-intesnsive	dry	sodo zuria	negative	absent	absent	absent	D. filarial and P. rufescens
139	hig land	ovine	female	adult	medium	extensive	wet	sodo zuria	negative	absent	absent	absent	D. filarial and P. rufescens
140	hig land	ovine	female	adult	poor	semi-intesnsive	dry	sodo zuria	positive	present	absent	absent	D. filarial and P. rufescens
141	hig land	ovine	female	young	medium	extensive	wet	sodo zuria	negative	absent	absent	absent	D. filarial and P. rufescens
142	hig land	ovine	female	young	poor	semi-intesnsive	wet	sodo zuria	positive	present	absent	absent	D. filarial and P. rufescens
143	hig land	ovine	male	young	poor	semi-intesnsive	dry	sodo zuria	negative	absent	absent	absent	D. filarial and P. rufescens
144	hig land	ovine	male	adult	medium	extensive	wet	sodo zuria	negative	absent	absent	absent	D. filarial and P. rufescens
145	hig land	ovine	male	adult	poor	semi-intesnsive	wet	sodo zuria	positive	present	absent	absent	D. filarial and P. rufescens
146	hig land	ovine	female	adult	medium	extensive	dry	sodo zuria	positive	present	absent	absent	D. filarial and P. rufescens
147	hig land	ovine	female	young	medium	semi-intesnsive	wet	sodo zuria	negative	absent	absent	absent	D. filarial and P. rufescens
148	hig land	ovine	female	young	poor	semi-intesnsive	wet	sodo zuria	positive	present	absent	absent	D. filarial and P. rufescens
149	hig land	ovine	male	adult	medium	semi-intesnsive	dry	sodo zuria	negative	absent	absent	absent	D. filarial and P. rufescens
150	hig land	ovine	female	young	poor	semi-intesnsive	wet	sodo zuria	positive	present	absent	absent	D. filarial and P. rufescens
151	hig land	caprine	female	young	medium	extensive	dry	sodo zuria	negative	absent	absent	absent	D. filarial and P. rufescens
152	hig land	caprine	male	adult	medium	semi-intesnsive	wet	sodo zuria	positive	absent	present	absent	D. filarial and P. rufescens
153	hig land	caprine	male	adult	good	semi-intesnsive	dry	sodo zuria	negative	absent	absent	absent	D. filarial and P. rufescens
154	hig land	caprine	female	young	poor	extensive	wet	sodo zuria	negative	absent	absent	absent	D. filarial and P. rufescens
155	hig land	ovine	female	adult	medium	semi-intesnsive	wet	sodo zuria	positive	absent	present	absent	D. filarial and P. rufescens
156	hig land	ovine	female	young	poor	extensive	dry	sodo zuria	negative	absent	absent	absent	D. filarial and P. rufescens
157	hig land	ovine	male	adult	poor	semi-intesnsive	wet	sodo zuria	positive	absent	present	absent	D. filarial and P. rufescens
158	hig land	ovine	male	adult	good	semi-intesnsive	dry	sodo zuria	negative	absent	absent	absent	D. filarial and P. rufescens
159	hig land	ovine	female	adult	medium	semi-intesnsive	dry	sodo zuria	positive	absent	present	absent	D. filarial and P. rufescens
160	hig land	ovine	female	adult	poor	extensive	wet	sodo zuria	positive	absent	present	absent	D. filarial and P. rufescens
161	hig land	ovine	male	young	poor	semi-intesnsive	dry	sodo zuria	negative	absent	absent	absent	D. filarial and P. rufescens
162	hig land	ovine	male	adult	medium	semi-intesnsive	wet	sodo zuria	positive	absent	present	absent	D. filarial and P. rufescens
163	hig land	ovine	male	adult	poor	extensive	dry	sodo zuria	negative	absent	absent	absent	D. filarial and P. rufescens
164	hig land	ovine	female	young	medium	semi-intesnsive	wet	sodo zuria	negative	absent	absent	absent	D. filarial and P. rufescens
165	hig land	ovine	female	young	good	semi-intesnsive	wet	sodo zuria	positive	absent	present	absent	D. filarial and P. rufescens
166	hig land	ovine	female	young	poor	semi-intesnsive	dry	sodo zuria	negative	absent	absent	absent	D. filarial and P. rufescens
167	hig land	ovine	female	adult	medium	semi-intesnsive	wet	sodo zuria	positive	absent	present	absent	D. filarial and P. rufescens
168	hig land	ovine	female	adult	medium	semi-intesnsive	dry	sodo zuria	negative	absent	absent	absent	D. filarial and P. rufescens
169	hig land	ovine	female	young	good	semi-intesnsive	wet	sodo zuria	positive	absent	present	absent	D. filarial and P. rufescens
170	hig land	ovine	female	young	poor	extensive	dry	sodo zuria	negative	absent	absent	absent	D. filarial and P. rufescens
171	hig land	ovine	female	young	medium	semi-intesnsive	wet	sodo zuria	positive	absent	present	absent	D. filarial and P. rufescens
172	hig land	ovine	female	adult	poor	semi-intesnsive	dry	sodo zuria	positive	absent	absent	present	D. filarial and P. rufescens
173	hig land	ovine	female	adult	medium	extensive	wet	sodo zuria	negative	absent	absent	absent	D. filarial and P. rufescens
174	hig land	ovine	female	young	medium	semi-intesnsive	dry	sodo zuria	positive	absent	present	absent	D. filarial and P. rufescens
175	mid land	ovine	male	young	poor	extensive	wet	sodo zuria	negative	absent	absent	absent	D. filarial and P. rufescens
176	hig land	ovine	male	adult	medium	semi-intesnsive	dry	sodo zuria	positive	absent	present	absent	D. filarial and P. rufescens
177	mid land	ovine	male	adult	medium	extensive	wet	sodo zuria	negative	absent	absent	absent	D. filarial and P. rufescens
178	hig land	ovine	male	young	poor	semi-intesnsive	dry	sodo zuria	positive	absent	present	absent	D. filarial and P. rufescens
179	mid land	ovine	female	adult	good	extensive	wet	sodo zuria	negative	absent	absent	absent	D. filarial and P. rufescens
180	hig land	ovine	female	adult	medium	semi-intesnsive	dry	sodo zuria	positive	absent	present	absent	D. filarial and P. rufescens
181	mid land	caprine	female	young	poor	semi-intesnsive	wet	sodo zuria	negative	absent	absent	absent	D. filarial and P. rufescens
182	mid land	caprine	female	young	good	semi-intesnsive	dry	sodo zuria	negative	absent	absent	absent	D. filarial and P. rufescens
183	hig land	caprine	female	young	medium	semi-intesnsive	wet	sodo zuria	positive	absent	present	absent	D. filarial and P. rufescens
184	mid land	caprine	female	adult	poor	semi-intesnsive	dry	sodo zuria	negative	absent	absent	absent	D. filarial and P. rufescens
185	hig land	ovine	female	adult	good	semi-intesnsive	wet	sodo zuria	positive	absent	present	absent	D. filarial and P. rufescens
186	hig land	ovine	male	adult	good	extensive	dry	sodo zuria	positive	absent	present	absent	D. filarial and P. rufescens
187	mid land	ovine	male	adult	poor	semi-intesnsive	wet	sodo zuria	negative	absent	absent	absent	D. filarial and P. rufescens
188	hig land	ovine	male	adult	good	semi-intesnsive	dry	sodo zuria	positive	absent	present	absent	D. filarial and P. rufescens
189	mid land	ovine	male	young	poor	extensive	wet	sodo zuria	negative	absent	absent	absent	D. filarial and P. rufescens
190	mid land	ovine	female	young	good	semi-intesnsive	dry	sodo zuria	positive	absent	present	absent	D. filarial and P. rufescens
191	mid land	ovine	female	adult	poor	semi-intesnsive	wet	sodo zuria	negative	absent	absent	absent	D. filarial and P. rufescens
192	mid land	ovine	female	adult	medium	extensive	dry	sodo zuria	positive	absent	present	absent	D. filarial and P. rufescens
193	mid land	ovine	male	adult	poor	semi-intesnsive	wet	sodo zuria	positive	absent	present	absent	D. filarial and P. rufescens
194	mid land	ovine	female	adult	medium	extensive	dry	sodo zuria	negative	absent	absent	absent	D. filarial and P. rufescens
195	mid land	ovine	female	adult	poor	extensive	wet	sodo zuria	positive	absent	present	absent	D. filarial and P. rufescens
196	mid land	ovine	female	young	medium	semi-intesnsive	dry	sodo zuria	positive	absent	present	absent	D. filarial and P. rufescens
197	mid land	ovine	female	young	medium	semi-intesnsive	wet	sodo zuria	negative	absent	absent	absent	D. filarial and P. rufescens
198	hig land	ovine	female	adult	poor	extensive	wet	sodo zuria	positive	absent	present	absent	D. filarial and P. rufescens
199	mid land	ovine	female	adult	medium	semi-intesnsive	dry	sodo zuria	negative	absent	absent	absent	D. filarial and P. rufescens
200	mid land	ovine	female	adult	poor	extensive	wet	sodo zuria	negative	absent	absent	absent	D. filarial and P. rufescens
201	hig land	ovine	female	young	poor	semi-intesnsive	dry	sodo zuria	positive	absent	present	absent	D. filarial and P. rufescens
202	mid land	ovine	female	young	good	extensive	wet	sodo zuria	negative	absent	absent	absent	D. filarial and P. rufescens
203	hig land	ovine	female	adult	medium	semi-intesnsive	dry	sodo zuria	positive	absent	present	absent	D. filarial and P. rufescens
204	mid land	ovine	male	adult	good	extensive	wet	sodo zuria	negative	absent	absent	absent	D. filarial and P. rufescens
205	hig land	ovine	female	adult	poor	semi-intesnsive	dry	sodo zuria	positive	absent	present	absent	D. filarial and P. rufescens
206	hig land	ovine	female	adult	medium	semi-intesnsive	wet	sodo zuria	positive	absent	absent	present	D. filarial and P. rufescens
207	mid land	ovine	male	young	medium	extensive	wet	sodo zuria	negative	absent	absent	absent	D. filarial and P. rufescens
208	mid land	ovine	male	young	poor	semi-intesnsive	dry	sodo zuria	positive	absent	present	absent	D. filarial and P. rufescens
209	mid land	ovine	male	young	poor	extensive	wet	sodo zuria	negative	absent	absent	absent	D. filarial and P. rufescens
210	mid land	ovine	male	adult	medium	semi-intesnsive	wet	sodo zuria	positive	absent	present	absent	D. filarial and P. rufescens
211	mid land	caprine	male	adult	good	extensive	dry	sodo zuria	negative	absent	absent	absent	D. filarial and P. rufescens
212	mid land	caprine	female	adult	poor	extensive	wet	sodo zuria	negative	absent	absent	absent	D. filarial and P. rufescens
213	mid land	caprine	male	young	medium	semi-intesnsive	dry	sodo zuria	positive	absent	present	absent	D. filarial and P. rufescens
214	mid land	caprine	female	adult	medium	extensive	wet	sodo zuria	negative	absent	absent	absent	D. filarial and P. rufescens
215	hig land	ovine	male	young	good	semi-intesnsive	dry	sodo zuria	positive	absent	present	absent	D. filarial and P. rufescens
216	mid land	ovine	female	adult	poor	semi-intesnsive	wet	sodo zuria	negative	absent	absent	absent	D. filarial and P. rufescens
217	hig land	ovine	female	adult	medium	semi-intesnsive	dry	sodo zuria	positive	absent	present	absent	D. filarial and P. rufescens
218	mid land	ovine	male	young	medium	semi-intesnsive	wet	sodo zuria	negative	absent	absent	absent	D. filarial and P. rufescens
219	mid land	ovine	male	adult	poor	semi-intesnsive	dry	sodo zuria	positive	absent	present	absent	D. filarial and P. rufescens
220	mid land	ovine	female	young	poor	extensive	wet	sodo zuria	negative	absent	absent	absent	D. filarial and P. rufescens
221	mid land	ovine	female	adult	medium	semi-intesnsive	dry	sodo zuria	positive	absent	present	absent	D. filarial and P. rufescens
222	mid land	ovine	female	young	good	semi-intesnsive	wet	sodo zuria	negative	absent	absent	absent	D. filarial and P. rufescens
223	mid land	ovine	female	adult	medium	extensive	dry	sodo zuria	positive	absent	present	absent	D. filarial and P. rufescens
224	hig land	ovine	male	adult	poor	semi-intesnsive	wet	sodo zuria	negative	absent	absent	absent	D. filarial and P. rufescens
225	hig land	ovine	male	adult	medium	semi-intesnsive	dry	sodo zuria	positive	absent	present	absent	D. filarial and P. rufescens
226	hig land	ovine	male	adult	poor	extensive	wet	sodo zuria	negative	absent	absent	absent	D. filarial and P. rufescens
227	mid land	ovine	male	adult	medium	semi-intesnsive	dry	sodo zuria	negative	absent	absent	absent	D. filarial and P. rufescens
228	mid land	ovine	male	young	medium	semi-intesnsive	wet	sodo zuria	positive	absent	present	absent	D. filarial and P. rufescens
229	mid land	ovine	male	young	poor	extensive	dry	sodo zuria	positive	absent	present	absent	D. filarial and P. rufescens
230	mid land	ovine	female	adult	poor	semi-intesnsive	wet	sodo zuria	positive	absent	present	absent	D. filarial and P. rufescens
231	mid land	ovine	female	adult	poor	semi-intesnsive	dry	sodo zuria	negative	absent	absent	absent	D. filarial and P. rufescens
232	mid land	ovine	female	adult	medium	semi-intesnsive	wet	sodo zuria	positive	absent	present	absent	D. filarial and P. rufescens
233	mid land	ovine	female	adult	good	semi-intesnsive	dry	sodo zuria	negative	absent	absent	absent	D. filarial and P. rufescens
234	mid land	ovine	female	young	poor	extensive	wet	sodo zuria	positive	absent	present	absent	D. filarial and P. rufescens
235	mid land	ovine	male	young	medium	extensive	dry	sodo zuria	negative	absent	absent	absent	D. filarial and P. rufescens
236	mid land	ovine	male	adult	medium	semi-intesnsive	wet	sodo zuria	negative	absent	absent	absent	D. filarial and P. rufescens
237	mid land	ovine	female	adult	poor	semi-intesnsive	dry	sodo zuria	positive	absent	present	absent	D. filarial and P. rufescens
238	mid land	ovine	male	adult	poor	semi-intesnsive	wet	sodo zuria	positive	absent	present	absent	D. filarial and P. rufescens
239	mid land	ovine	female	adult	medium	extensive	dry	sodo zuria	negative	absent	absent	absent	D. filarial and P. rufescens
240	mid land	ovine	male	adult	medium	semi-intesnsive	wet	sodo zuria	negative	absent	absent	absent	D. filarial and P. rufescens
241	mid land	ovine	male	young	poor	semi-intesnsive	dry	sodo zuria	positive	absent	present	absent	D. filarial and P. rufescens
242	mid land	ovine	male	young	poor	extensive	wet	sodo zuria	negative	absent	absent	absent	D. filarial and P. rufescens
243	mid land	ovine	male	adult	poor	semi-intesnsive	wet	sodo zuria	positive	absent	present	absent	D. filarial and P. rufescens
244	mid land	ovine	female	adult	medium	semi-intesnsive	dry	sodo zuria	positive	absent	present	absent	D. filarial and P. rufescens
245	mid land	ovine	male	adult	medium	extensive	wet	sodo zuria	negative	absent	absent	absent	D. filarial and P. rufescens
246	mid land	ovine	male	young	good	semi-intesnsive	dry	sodo zuria	positive	absent	present	absent	D. filarial and P. rufescens
247	mid land	ovine	female	adult	poor	semi-intesnsive	wet	sodo zuria	negative	absent	absent	absent	D. filarial and P. rufescens
248	mid land	ovine	female	adult	medium	extensive	dry	sodo zuria	negative	absent	absent	absent	D. filarial and P. rufescens
249	hig land	ovine	male	adult	medium	semi-intesnsive	wet	sodo zuria	positive	absent	present	absent	D. filarial and P. rufescens
250	hig land	ovine	male	young	poor	extensive	wet	sodo zuria	positive	absent	present	absent	D. filarial and P. rufescens
251	hig land	ovine	male	young	good	semi-intesnsive	wet	sodo zuria	negative	absent	absent	absent	D. filarial and P. rufescens
252	hig land	ovine	male	adult	poor	extensive	wet	sodo zuria	negative	absent	absent	absent	D. filarial and P. rufescens
253	mid land	ovine	male	adult	poor	semi-intesnsive	wet	sodo zuria	positive	absent	present	absent	D. filarial and P. rufescens
254	hig land	caprine	female	young	medium	extensive	dry	damot gale	positive	absent	absent	absent	D. filarial and P. rufescens
255	hig land	caprine	female	young	medium	semi-intesnsive	wet	damot gale	positive	absent	absent	present	D. filarial and P. rufescens
256	hig land	caprine	male	adult	poor	extensive	dry	damot gale	negative	absent	absent	absent	D. filarial and P. rufescens
257	hig land	caprine	female	young	medium	extensive	wet	damot gale	positive	present	absent	absent	D. filarial and P. rufescens
258	hig land	caprine	female	young	poor	semi-intesnsive	dry	damot gale	negative	absent	absent	absent	D. filarial and P. rufescens
259	hig land	caprine	female	young	medium	semi-intesnsive	wet	damot gale	positive	present	absent	absent	D. filarial and P. rufescens
260	hig land	ovine	male	adult	poor	semi-intesnsive	dry	damot gale	positive	present	absent	absent	D. filarial and P. rufescens
261	hig land	ovine	male	adult	poor	semi-intesnsive	wet	damot gale	positive	present	absent	absent	D. filarial and P. rufescens
262	hig land	ovine	female	adult	medium	semi-intesnsive	dry	damot gale	negative	absent	absent	absent	D. filarial and P. rufescens
263	hig land	ovine	female	young	poor	semi-intesnsive	wet	damot gale	negative	absent	absent	absent	D. filarial and P. rufescens
264	hig land	ovine	female	young	poor	extensive	dry	damot gale	positive	present	absent	absent	D. filarial and P. rufescens
265	hig land	ovine	female	adult	medium	semi-intesnsive	wet	damot gale	negative	absent	absent	absent	D. filarial and P. rufescens
266	hig land	ovine	male	adult	poor	semi-intesnsive	dry	damot gale	positive	present	absent	absent	D. filarial and P. rufescens
267	hig land	ovine	male	adult	medium	extensive	wet	damot gale	negative	absent	absent	absent	D. filarial and P. rufescens
268	hig land	ovine	female	young	medium	extensive	dry	damot gale	negative	absent	absent	absent	D. filarial and P. rufescens
269	hig land	ovine	male	young	poor	semi-intesnsive	wet	damot gale	positive	present	absent	absent	D. filarial and P. rufescens
270	hig land	ovine	male	adult	good	semi-intesnsive	dry	damot gale	negative	absent	absent	absent	D. filarial and P. rufescens
271	hig land	ovine	female	adult	medium	extensive	wet	damot gale	negative	absent	absent	absent	D. filarial and P. rufescens
272	hig land	ovine	female	young	poor	extensive	dry	damot gale	positive	present	absent	absent	D. filarial and P. rufescens
273	hig land	ovine	male	adult	medium	semi-intesnsive	wet	damot gale	negative	absent	absent	absent	D. filarial and P. rufescens
274	hig land	ovine	male	young	poor	extensive	dry	damot gale	negative	absent	absent	absent	D. filarial and P. rufescens
275	hig land	ovine	female	young	medium	semi-intesnsive	wet	damot gale	positive	present	absent	absent	D. filarial and P. rufescens
276	mid land	ovine	female	young	good	semi-intesnsive	dry	damot gale	negative	absent	absent	absent	D. filarial and P. rufescens
277	mid land	ovine	male	adult	poor	extensive	wet	damot gale	negative	absent	absent	absent	D. filarial and P. rufescens
278	hig land	ovine	female	adult	medium	semi-intesnsive	dry	damot gale	positive	present	absent	absent	D. filarial and P. rufescens
279	hig land	ovine	female	adult	good	extensive	wet	damot gale	negative	absent	absent	absent	D. filarial and P. rufescens
280	hig land	ovine	female	adult	poor	semi-intesnsive	dry	damot gale	positive	present	absent	absent	D. filarial and P. rufescens
281	hig land	ovine	male	young	medium	semi-intesnsive	wet	damot gale	negative	absent	absent	absent	D. filarial and P. rufescens
282	hig land	ovine	male	young	medium	semi-intesnsive	dry	damot gale	positive	present	absent	absent	D. filarial and P. rufescens
283	hig land	ovine	female	adult	poor	semi-intesnsive	wet	damot gale	negative	absent	absent	absent	D. filarial and P. rufescens
284	hig land	ovine	female	adult	medium	semi-intesnsive	dry	damot gale	positive	present	absent	absent	D. filarial and P. rufescens
285	hig land	ovine	female	adult	medium	extensive	wet	damot gale	positive	present	absent	absent	D. filarial and P. rufescens
286	hig land	ovine	male	adult	poor	semi-intesnsive	dry	damot gale	negative	absent	absent	absent	D. filarial and P. rufescens
287	hig land	ovine	male	adult	good	extensive	wet	damot gale	negative	absent	absent	absent	D. filarial and P. rufescens
288	hig land	ovine	male	young	poor	semi-intesnsive	dry	damot gale	positive	present	absent	absent	D. filarial and P. rufescens
289	hig land	ovine	female	young	medium	semi-intesnsive	wet	damot gale	positive	absent	absent	present	D. filarial and P. rufescens
290	mid land	ovine	female	young	poor	semi-intesnsive	dry	damot gale	negative	absent	absent	absent	D. filarial and P. rufescens
291	mid land	ovine	female	adult	good	extensive	wet	damot gale	negative	absent	absent	absent	D. filarial and P. rufescens
292	hig land	ovine	female	adult	poor	semi-intesnsive	dry	damot gale	positive	present	absent	absent	D. filarial and P. rufescens
293	hig land	ovine	female	adult	medium	semi-intesnsive	wet	damot gale	positive	present	absent	absent	D. filarial and P. rufescens
294	hig land	ovine	male	adult	poor	extensive	dry	damot gale	negative	absent	absent	absent	D. filarial and P. rufescens
295	hig land	ovine	male	young	poor	semi-intesnsive	wet	damot gale	negative	absent	absent	absent	D. filarial and P. rufescens
296	hig land	ovine	female	adult	medium	semi-intesnsive	wet	damot gale	positive	present	absent	absent	D. filarial and P. rufescens
297	hig land	ovine	female	young	good	semi-intesnsive	wet	damot gale	positive	present	absent	absent	D. filarial and P. rufescens
298	mid land	ovine	male	young	medium	extensive	dry	damot gale	negative	absent	absent	absent	D. filarial and P. rufescens
299	mid land	ovine	male	young	good	semi-intesnsive	wet	damot gale	negative	absent	absent	absent	D. filarial and P. rufescens
300	hig land	ovine	female	adult	poor	extensive	dry	damot gale	positive	present	absent	absent	D. filarial and P. rufescens
301	hig land	caprine	female	young	poor	semi-intesnsive	wet	damot gale	positive	present	absent	absent	D. filarial and P. rufescens
302	hig land	caprine	female	adult	good	semi-intesnsive	dry	damot gale	negative	absent	absent	absent	D. filarial and P. rufescens
303	hig land	caprine	male	adult	medium	extensive	wet	damot gale	positive	present	absent	absent	D. filarial and P. rufescens
304	mid land	caprine	male	young	poor	semi-intesnsive	wet	damot gale	negative	absent	absent	absent	D. filarial and P. rufescens
305	hig land	caprine	female	young	good	semi-intesnsive	dry	damot gale	positive	present	absent	absent	D. filarial and P. rufescens
306	hig land	ovine	female	adult	medium	extensive	wet	damot gale	positive	present	absent	absent	D. filarial and P. rufescens
307	hig land	ovine	female	adult	medium	semi-intesnsive	dry	damot gale	positive	present	absent	absent	D. filarial and P. rufescens
308	hig land	ovine	female	adult	good	semi-intesnsive	wet	damot gale	negative	absent	absent	absent	D. filarial and P. rufescens
309	hig land	ovine	male	adult	good	extensive	wet	damot gale	negative	absent	absent	absent	D. filarial and P. rufescens
310	hig land	ovine	male	young	poor	semi-intesnsive	dry	damot gale	positive	present	absent	absent	D. filarial and P. rufescens
311	hig land	ovine	female	adult	medium	semi-intesnsive	wet	damot gale	positive	present	absent	absent	D. filarial and P. rufescens
312	hig land	ovine	female	young	medium	extensive	dry	damot gale	negative	absent	absent	absent	D. filarial and P. rufescens
313	hig land	ovine	female	adult	poor	extensive	wet	damot gale	negative	absent	absent	absent	D. filarial and P. rufescens
314	hig land	ovine	female	young	medium	semi-intesnsive	dry	damot gale	positive	present	absent	absent	D. filarial and P. rufescens
315	hig land	caprine	female	adult	medium	extensive	wet	damot gale	negative	absent	absent	absent	D. filarial and P. rufescens
316	hig land	caprine	male	young	medium	semi-intesnsive	wet	damot gale	positive	present	absent	absent	D. filarial and M. capillaries
317	hig land	caprine	male	young	poor	extensive	dry	damot gale	negative	absent	absent	absent	D. filarial and P. rufescens
318	hig land	caprine	male	adult	medium	extensive	wet	damot gale	positive	present	absent	absent	D. filarial and P. rufescens
319	hig land	caprine	male	adult	medium	semi-intesnsive	wet	damot gale	positive	absent	absent	absent	D. filarial and P. rufescens
320	hig land	ovine	female	young	medium	semi-intesnsive	dry	damot gale	positive	present	absent	absent	D. filarial and P. rufescens
321	hig land	ovine	female	adult	poor	extensive	wet	damot gale	negative	absent	absent	absent	D. filarial and P. rufescens
322	hig land	ovine	female	adult	medium	semi-intesnsive	wet	damot gale	positive	present	absent	absent	D. filarial and P. rufescens
323	hig land	ovine	male	young	medium	semi-intesnsive	dry	damot gale	negative	absent	absent	absent	D. filarial and P. rufescens
324	hig land	ovine	female	young	medium	extensive	wet	damot gale	negative	absent	absent	absent	D. filarial and P. rufescens
325	hig land	ovine	male	adult	poor	semi-intesnsive	wet	damot gale	positive	present	absent	absent	D. filarial and P. rufescens
326	hig land	ovine	female	adult	good	extensive	dry	damot gale	negative	absent	absent	absent	D. filarial and P. rufescens
327	hig land	ovine	female	young	medium	semi-intesnsive	wet	damot gale	positive	absent	present	absent	D. filarial and P. rufescens
328	hig land	ovine	male	adult	poor	extensive	wet	damot gale	negative	absent	absent	absent	D. filarial and P. rufescens
329	hig land	ovine	male	adult	medium	extensive	wet	damot gale	negative	absent	absent	absent	D. filarial and P. rufescens
330	hig land	ovine	female	adult	good	extensive	dry	damot gale	positive	absent	present	absent	D. filarial and P. rufescens
331	hig land	ovine	female	young	medium	semi-intesnsive	wet	damot gale	negative	absent	absent	absent	D. filarial and P. rufescens
332	hig land	ovine	female	young	medium	semi-intesnsive	wet	damot gale	positive	absent	present	absent	D. filarial and P. rufescens
333	hig land	ovine	male	young	good	extensive	dry	damot gale	negative	absent	absent	absent	D. filarial and P. rufescens
334	hig land	ovine	female	adult	good	extensive	wet	damot gale	negative	absent	absent	absent	D. filarial and P. rufescens
335	hig land	ovine	male	young	poor	semi-intesnsive	wet	damot gale	positive	absent	present	absent	D. filarial and P. rufescens
336	hig land	ovine	female	adult	medium	extensive	dry	damot gale	negative	absent	absent	absent	D. filarial and P. rufescens
337	hig land	ovine	female	young	medium	semi-intesnsive	wet	damot gale	negative	absent	absent	absent	D. filarial and P. rufescens
338	hig land	ovine	male	young	medium	extensive	wet	damot gale	positive	absent	present	absent	D. filarial and P. rufescens
339	hig land	ovine	male	adult	medium	semi-intesnsive	dry	damot gale	negative	absent	absent	absent	D. filarial and P. rufescens
340	hig land	caprine	female	adult	poor	extensive	wet	damot gale	negative	absent	absent	absent	D. filarial and P. rufescens
341	hig land	caprine	female	adult	poor	semi-intesnsive	dry	damot gale	negative	absent	absent	absent	D. filarial and P. rufescens
342	hig land	caprine	female	young	good	semi-intesnsive	dry	damot gale	positive	present	absent	absent	D. filarial and P. rufescens
343	hig land	caprine	male	young	medium	semi-intesnsive	wet	damot gale	negative	absent	absent	absent	D. filarial and P. rufescens
344	hig land	caprine	male	adult	medium	extensive	wet	damot gale	negative	absent	absent	absent	D. filarial and P. rufescens
345	hig land	caprine	female	adult	medium	semi-intesnsive	dry	damot gale	positive	present	absent	absent	D. filarial and P. rufescens
346	mid land	caprine	female	adult	good	semi-intesnsive	wet	damot gale	negative	absent	absent	absent	D. filarial and P. rufescens
347	mid land	caprine	female	young	poor	extensive	wet	damot gale	negative	absent	absent	absent	D. filarial and P. rufescens
348	hig land	caprine	female	young	poor	extensive	dry	damot gale	positive	absent	absent	present	D. filarial and P. rufescens
349	hig land	caprine	male	adult	medium	semi-intesnsive	dry	damot gale	positive	absent	absent	present	D. filarial and P. rufescens
350	hig land	ovine	male	adult	medium	extensive	wet	damot gale	negative	absent	absent	absent	D. filarial and P. rufescens
351	hig land	ovine	female	adult	good	semi-intesnsive	dry	damot gale	positive	absent	present	absent	D. filarial and P. rufescens
352	hig land	ovine	female	adult	good	extensive	wet	damot gale	negative	absent	absent	absent	D. filarial and P. rufescens
353	hig land	ovine	female	young	good	semi-intesnsive	dry	damot gale	negative	absent	absent	absent	D. filarial and P. rufescens
354	hig land	ovine	female	young	medium	semi-intesnsive	wet	damot gale	negative	absent	absent	absent	D. filarial and P. rufescens
355	hig land	ovine	female	young	medium	semi-intesnsive	wet	damot gale	positive	absent	present	absent	D. filarial and P. rufescens
356	hig land	ovine	male	young	medium	extensive	dry	damot gale	negative	absent	absent	absent	D. filarial and P. rufescens
357	hig land	ovine	male	adult	poor	semi-intesnsive	dry	damot gale	positive	absent	absent	present	D. filarial and P. rufescens
358	hig land	ovine	female	adult	good	semi-intesnsive	wet	damot gale	negative	absent	absent	absent	D. filarial and P. rufescens
359	hig land	ovine	female	adult	medium	extensive	dry	damot gale	negative	absent	absent	absent	D. filarial and P. rufescens
360	hig land	ovine	female	adult	poor	semi-intesnsive	wet	damot gale	positive	absent	absent	present	D. filarial and P. rufescens
361	hig land	ovine	female	young	poor	extensive	wet	damot gale	negative	absent	absent	absent	D. filarial and P. rufescens
362	hig land	ovine	female	young	medium	semi-intesnsive	dry	damot gale	positive	absent	absent	present	D. filarial and P. rufescens
363	hig land	ovine	female	adult	medium	semi-intesnsive	wet	damot gale	negative	absent	absent	absent	D. filarial and P. rufescens
364	hig land	ovine	male	adult	medium	semi-intesnsive	wet	damot gale	positive	absent	absent	present	D. filarial and P. rufescens
365	mid land	ovine	male	adult	medium	extensive	dry	damot gale	negative	absent	absent	absent	D. filarial and P. rufescens
366	mid land	ovine	female	young	poor	semi-intesnsive	wet	damot gale	negative	absent	absent	absent	D. filarial and P. rufescens
367	hig land	ovine	female	adult	good	semi-intesnsive	dry	damot gale	positive	absent	absent	present	D. filarial and P. rufescens
368	hig land	ovine	female	young	poor	extensive	dry	damot gale	negative	absent	absent	absent	D. filarial and P. rufescens
369	mid land	ovine	female	adult	medium	semi-intesnsive	wet	damot gale	negative	absent	absent	absent	D. filarial and P. rufescens
370	hig land	caprine	male	young	medium	semi-intesnsive	wet	damot gale	positive	absent	absent	present	D. filarial and P. rufescens
371	mid land	caprine	male	young	medium	extensive	dry	damot gale	negative	absent	absent	absent	D. filarial and P. rufescens
372	mid land	ovine	female	adult	good	semi-intesnsive	wet	damot gale	negative	absent	absent	absent	D. filarial and P. rufescens
373	hig land	ovine	female	young	good	extensive	wet	damot gale	positive	absent	absent	present	D. filarial and P. rufescens
374	mid land	ovine	female	adult	medium	semi-intesnsive	dry	damot gale	negative	absent	absent	absent	D. filarial and P. rufescens
375	mid land	ovine	female	adult	poor	extensive	wet	damot gale	negative	absent	absent	absent	D. filarial and P. rufescens
376	hig land	ovine	female	young	medium	semi-intesnsive	wet	damot gale	positive	absent	absent	present	D. filarial and P. rufescens
377	hig land	ovine	male	adult	medium	extensive	dry	damot gale	negative	absent	absent	absent	D. filarial and P. rufescens
378	mid land	ovine	male	adult	medium	extensive	wet	damot gale	negative	absent	absent	absent	D. filarial and P. rufescens
379	mid land	ovine	female	young	medium	semi-intesnsive	dry	damot gale	negative	absent	absent	absent	D. filarial and P. rufescens
380	hig land	ovine	male	adult	poor	extensive	wet	damot gale	positive	absent	absent	present	D. filarial and P. rufescens
381	mid land	caprine	male	adult	medium	semi-intesnsive	dry	damot gale	negative	absent	absent	absent	D. filarial and P. rufescens
382	mid land	caprine	female	adult	good	extensive	dry	damot gale	positive	absent	absent	present	D. filarial and P. rufescens
383	mid land	caprine	female	young	medium	semi-intesnsive	wet	damot gale	negative	absent	absent	absent	D. filarial and P. rufescens
384	mid land	caprine	female	adult	poor	semi-intesnsive	dry	damot gale	negative	absent	absent	absent	D. filarial and P. rufescens
385	mid land	caprine	male	adult	good	semi-intesnsive	wet	damot gale	positive	absent	absent	present	D. filarial and P. rufescens
386	mid land	ovine	female	adult	medium	semi-intesnsive	wet	damot gale	positive	absent	absent	present	D. filarial and P. rufescens
387	mid land	ovine	female	adult	poor	extensive	dry	damot gale	negative	absent	absent	absent	D. filarial and P. rufescens
388	mid land	ovine	female	young	medium	semi-intesnsive	wet	damot gale	positive	absent	absent	present	D. filarial and P. rufescens
389	mid land	ovine	female	young	good	semi-intesnsive	wet	damot gale	negative	absent	absent	absent	D. filarial and P. rufescens
390	mid land	ovine	male	adult	medium	extensive	dry	damot gale	positive	absent	absent	present	D. filarial and P. rufescens
391	mid land	ovine	male	adult	poor	semi-intesnsive	wet	damot gale	positive	absent	absent	present	D. filarial and P. rufescens
392	mid land	ovine	female	adult	good	extensive	dry	damot gale	negative	absent	absent	absent	D. filarial and P. rufescens
393	mid land	ovine	female	adult	medium	semi-intesnsive	wet	damot gale	positive	absent	absent	present	D. filarial and P. rufescens
394	mid land	ovine	male	young	medium	semi-intesnsive	dry	damot gale	negative	absent	absent	absent	D. filarial and P. rufescens
395	mid land	ovine	female	adult	medium	extensive	wet	damot gale	positive	absent	absent	present	D. filarial and P. rufescens
396	mid land	ovine	female	adult	poor	semi-intesnsive	dry	damot gale	negative	absent	absent	absent	D. filarial and P. rufescens
397	mid land	ovine	male	young	medium	extensive	wet	damot gale	negative	absent	absent	absent	D. filarial and P. rufescens
398	mid land	ovine	male	adult	good	semi-intesnsive	dry	damot gale	positive	absent	absent	present	D. filarial and P. rufescens
399	mid land	ovine	female	adult	good	extensive	wet	damot gale	negative	absent	absent	absent	D. filarial and P. rufescens
400	mid land	ovine	female	adult	medium	semi-intesnsive	wet	damot gale	positive	absent	absent	present	D. filarial and P. rufescens
401	mid land	ovine	female	young	medium	extensive	dry	damot gale	negative	absent	absent	absent	D. filarial and P. rufescens
402	mid land	ovine	female	young	poor	semi-intesnsive	wet	damot gale	positive	absent	absent	present	D. filarial and P. rufescens
403	mid land	ovine	female	adult	medium	extensive	wet	damot gale	negative	absent	absent	absent	D. filarial and P. rufescens
404	mid land	ovine	male	adult	good	semi-intesnsive	dry	damot gale	positive	absent	absent	present	D. filarial and P. rufescens
405	mid land	caprine	male	adult	medium	semi-intesnsive	wet	damot gale	negative	absent	absent	absent	D. filarial and P. rufescens
406	mid land	caprine	female	young	poor	semi-intesnsive	dry	damot gale	positive	absent	absent	present	D. filarial and P. rufescens
407	mid land	caprine	male	adult	medium	semi-intesnsive	wet	damot gale	negative	absent	absent	absent	D. filarial and P. rufescens
408	mid land	ovine	male	young	medium	semi-intesnsive	dry	damot gale	positive	absent	absent	present	D. filarial and P. rufescens
409	mid land	ovine	female	adult	poor	semi-intesnsive	wet	damot gale	negative	absent	absent	absent	D. filarial and P. rufescens
410	mid land	ovine	female	adult	good	extensive	wet	damot gale	positive	absent	absent	present	D. filarial and P. rufescens
411	mid land	ovine	female	young	medium	semi-intesnsive	dry	damot gale	negative	absent	absent	absent	D. filarial and P. rufescens
412	mid land	ovine	male	adult	poor	extensive	wet	damot gale	negative	absent	absent	absent	D. filarial and P. rufescens
413	mid land	ovine	female	adult	medium	semi-intesnsive	wet	damot gale	positive	absent	absent	present	D. filarial and P. rufescens
414	mid land	ovine	female	young	medium	extensive	dry	damot gale	negative	absent	absent	absent	D. filarial and P. rufescens
415	mid land	ovine	female	adult	good	semi-intesnsive	wet	damot gale	negative	absent	absent	absent	D. filarial and P. rufescens
416	mid land	ovine	male	young	poor	semi-intesnsive	wet	damot gale	positive	absent	absent	present	D. filarial and P. rufescens
417	mid land	ovine	male	young	good	extensive	dry	damot gale	negative	absent	absent	absent	D. filarial and P. rufescens
418	mid land	ovine	female	adult	medium	semi-intesnsive	wet	damot gale	positive	absent	absent	present	D. filarial and P. rufescens
419	mid land	ovine	female	adult	poor	semi-intesnsive	wet	damot gale	negative	absent	absent	absent	D. filarial and P. rufescens
420	mid land	ovine	female	young	good	semi-intesnsive	dry	damot gale	positive	absent	absent	present	D. filarial and P. rufescens
421	mid land	ovine	female	adult	medium	semi-intesnsive	wet	damot gale	negative	absent	absent	absent	D. filarial and P. rufescens
422	mid land	ovine	female	adult	medium	extensive	wet	damot gale	negative	absent	absent	absent	D. filarial and P. rufescens
423	mid land	ovine	male	adult	poor	semi-intesnsive	dry	damot gale	positive	absent	absent	present	D. filarial and P. rufescens
424	mid land	ovine	male	young	good	extensive	wet	damot gale	negative	absent	absent	absent	D. filarial and P. rufescens
425	mid land	ovine	female	adult	poor	semi-intesnsive	dry	damot gale	negative	absent	absent	absent	D. filarial and P. rufescens
426	mid land	ovine	female	adult	medium	extensive	wet	damot gale	positive	absent	absent	present	D. filarial and P. rufescens
427	mid land	ovine	female	young	medium	semi-intesnsive	dry	damot gale	negative	absent	absent	absent	D. filarial and P. rufescens
428	mid land	ovine	female	adult	good	extensive	wet	damot gale	negative	absent	absent	absent	D. filarial and P. rufescens
429	mid land	ovine	male	adult	poor	semi-intesnsive	dry	damot gale	positive	absent	absent	present	D. filarial and P. rufescens
430	mid land	ovine	female	young	medium	extensive	wet	damot gale	negative	absent	absent	absent	D. filarial and P. rufescens
431	mid land	ovine	female	young	medium	semi-intesnsive	wet	damot gale	negative	absent	absent	absent	D. filarial and P. rufescens
432	mid land	ovine	male	young	good	semi-intesnsive	dry	damot gale	positive	absent	absent	present	D. filarial and P. rufescens
433	mid land	ovine	female	adult	medium	semi-intesnsive	wet	damot gale	negative	absent	absent	absent	D. filarial and P. rufescens
434	mid land	ovine	female	adult	poor	semi-intesnsive	wet	damot gale	negative	absent	absent	absent	D. filarial and P. rufescens
435	mid land	ovine	male	young	medium	extensive	dry	damot gale	positive	absent	absent	present	D. filarial and P. rufescens
436	mid land	ovine	female	adult	medium	extensive	wet	damot gale	negative	absent	absent	absent	D. filarial and P. rufescens
437	hig land	ovine	female	adult	poor	extensive	wet	damot gale	positive	absent	absent	present	D. filarial and P. rufescens
438	hig land	ovine	male	adult	medium	semi-intesnsive	dry	damot gale	negative	absent	absent	absent	D. filarial and P. rufescens
439	hig land	ovine	female	adult	poor	semi-intesnsive	dry	damot gale	negative	absent	absent	absent	D. filarial and P. rufescens
440	hig land	ovine	female	young	good	semi-intesnsive	wet	damot gale	positive	absent	absent	present	D. filarial and P. rufescens
441	mid land	ovine	female	young	poor	extensive	dry	damot gale	negative	absent	absent	absent	D. filarial and P. rufescens
442	mid land	ovine	male	adult	good	semi-intesnsive	wet	damot gale	negative	absent	absent	absent	D. filarial and P. rufescens
443	mid land	ovine	female	adult	medium	semi-intesnsive	wet	damot gale	positive	absent	absent	present	D. filarial and P. rufescens
444	mid land	ovine	female	adult	good	extensive	dry	damot gale	negative	absent	absent	absent	D. filarial and P. rufescens
445	low land	ovine	male	adult	poor	semi-intesnsive	wet	damot gale	positive	absent	absent	present	D. filarial and P. rufescens
446	low land	ovine	male	adult	good	extensive	wet	damot gale	negative	absent	absent	absent	D. filarial and P. rufescens
447	low land	ovine	male	young	poor	semi-intesnsive	dry	damot gale	negative	absent	absent	absent	D. filarial and P. rufescens
448	low land	ovine	female	young	medium	extensive	wet	damot gale	negative	absent	absent	absent	D. filarial and P. rufescens
449	low land	ovine	female	adult	good	semi-intesnsive	wet	damot gale	negative	absent	absent	absent	D. filarial and P. rufescens
450	low land	ovine	female	adult	poor	semi-intesnsive	dry	damot gale	positive	absent	absent	present	D. filarial and P. rufescens
451	low land	caprine	male	adult	good	extensive	wet	damot gale	negative	absent	absent	absent	D. filarial and P. rufescens
452	low land	caprine	female	adult	good	semi-intesnsive	wet	damot gale	negative	absent	absent	absent	D. filarial and P. rufescens
453	hig land	caprine	female	adult	poor	semi-intesnsive	dry	damot gale	positive	absent	present	absent	D. filarial and P. rufescens
454	hig land	caprine	female	young	good	extensive	dry	damot gale	negative	absent	absent	absent	D. filarial and P. rufescens
455	hig land	caprine	male	adult	poor	semi-intesnsive	wet	damot gale	negative	absent	absent	absent	D. filarial and P. rufescens
456	hig land	ovine	female	adult	medium	semi-intesnsive	dry	damot gale	positive	absent	absent	present	D. filarial and P. rufescens
457	hig land	ovine	male	young	poor	extensive	wet	damot gale	negative	absent	absent	absent	D. filarial and P. rufescens
458	hig land	ovine	female	adult	good	semi-intesnsive	wet	damot gale	negative	absent	absent	absent	D. filarial and P. rufescens
459	hig land	ovine	female	adult	medium	semi-intesnsive	dry	damot gale	positive	absent	absent	present	D. filarial and P. rufescens
460	hig land	ovine	male	adult	good	extensive	wet	damot gale	negative	absent	absent	absent	D. filarial and P. rufescens
461	hig land	ovine	male	young	good	extensive	wet	damot gale	negative	absent	absent	absent	D. filarial and P. rufescens
462	low land	ovine	female	young	good	semi-intesnsive	dry	damot gale	negative	absent	absent	absent	D. filarial and P. rufescens
463	low land	ovine	female	adult	medium	extensive	wet	damot gale	negative	absent	absent	absent	D. filarial and P. rufescens
464	low land	ovine	male	adult	poor	semi-intesnsive	dry	damot gale	positive	absent	absent	present	D. filarial and P. rufescens
465	low land	ovine	male	adult	good	semi-intesnsive	wet	damot gale	negative	absent	absent	absent	D. filarial and P. rufescens
466	low land	ovine	female	adult	medium	extensive	dry	damot gale	negative	absent	absent	absent	D. filarial and P. rufescens
467	low land	ovine	female	young	poor	semi-intesnsive	wet	damot gale	negative	absent	absent	absent	D. filarial and P. rufescens
468	low land	ovine	female	young	good	semi-intesnsive	wet	damot gale	positive	absent	absent	present	D. filarial and P. rufescens
469	low land	ovine	male	adult	poor	semi-intesnsive	dry	damot gale	negative	absent	absent	absent	D. filarial and P. rufescens
470	low land	ovine	male	adult	medium	extensive	wet	damot gale	negative	absent	absent	absent	D. filarial and P. rufescens
471	low land	ovine	female	young	good	semi-intesnsive	wet	damot gale	positive	absent	absent	present	D. filarial and P. rufescens
472	low land	ovine	female	young	poor	semi-intesnsive	wet	damot gale	negative	absent	absent	absent	D. filarial and P. rufescens
473	low land	ovine	female	adult	poor	extensive	dry	damot gale	negative	absent	absent	absent	D. filarial and P. rufescens
474	low land	ovine	female	adult	medium	semi-intesnsive	dry	damot gale	positive	absent	absent	present	D. filarial and P. rufescens
475	low land	ovine	male	adult	medium	extensive	wet	damot gale	negative	absent	absent	absent	D. filarial and P. rufescens
476	low land	ovine	female	adult	medium	extensive	dry	damot gale	positive	absent	absent	present	D. filarial and P. rufescens
477	low land	ovine	female	adult	poor	semi-intesnsive	wet	damot gale	negative	absent	absent	absent	D. filarial and P. rufescens
478	low land	ovine	female	adult	poor	semi-intesnsive	wet	damot gale	negative	absent	absent	absent	D. filarial and P. rufescens
479	low land	ovine	female	young	good	extensive	dry	damot gale	positive	absent	absent	absent	D. filarial and M. capillaries
480	hig land	ovine	male	young	medium	semi-intesnsive	wet	damot gale	negative	absent	absent	absent	D. filarial and P. rufescens
481	hig land	caprine	male	adult	poor	semi-intesnsive	wet	damot gale	negative	absent	absent	absent	D. filarial and P. rufescens
482	hig land	caprine	female	adult	good	semi-intesnsive	dry	damot gale	negative	absent	absent	absent	D. filarial and P. rufescens
483	hig land	caprine	female	adult	medium	extensive	wet	damot gale	negative	absent	absent	absent	D. filarial and P. rufescens
484	hig land	caprine	female	adult	good	semi-intesnsive	wet	damot gale	positive	absent	present	absent	D. filarial and P. rufescens
485	low land	caprine	female	adult	good	semi-intesnsive	dry	damot gale	negative	absent	absent	absent	D. filarial and P. rufescens
486	low land	ovine	female	adult	poor	extensive	wet	damot gale	positive	absent	absent	absent	D. filarial and P. rufescens
487	low land	ovine	male	young	medium	semi-intesnsive	wet	damot gale	negative	absent	absent	absent	D. filarial and P. rufescens
488	low land	ovine	female	adult	good	semi-intesnsive	dry	damot gale	positive	absent	absent	absent	D. filarial and M. capillaries
489	low land	ovine	female	young	poor	extensive	dry	damot gale	negative	absent	absent	absent	D. filarial and P. rufescens
490	low land	ovine	female	adult	good	extensive	wet	damot gale	positive	absent	absent	absent	D. filarial and P. rufescens
491	low land	ovine	male	adult	medium	extensive	dry	damot gale	negative	absent	absent	absent	D. filarial and P. rufescens
492	low land	ovine	female	adult	medium	semi-intesnsive	dry	damot gale	positive	absent	absent	absent	D. filarial and P. rufescens
493	low land	ovine	female	young	good	semi-intesnsive	wet	damot gale	negative	absent	absent	absent	D. filarial and P. rufescens
494	low land	ovine	male	young	good	semi-intesnsive	dry	damot gale	negative	absent	absent	absent	D. filarial and P. rufescens
495	low land	ovine	female	young	good	extensive	dry	damot gale	positive	absent	absent	absent	D. filarial and M. capillaries
496	low land	ovine	female	adult	poor	extensive	wet	damot gale	negative	absent	absent	absent	D. filarial and P. rufescens
497	low land	ovine	female	adult	good	extensive	dry	damot gale	negative	absent	absent	absent	D. filarial and P. rufescens
498	low land	ovine	male	adult	medium	semi-intesnsive	wet	damot gale	negative	absent	absent	absent	D. filarial and P. rufescens
499	low land	ovine	female	adult	poor	semi-intesnsive	wet	damot gale	negative	absent	absent	absent	D. filarial and P. rufescens
500	low land	ovine	female	adult	good	semi-intesnsive	dry	damot gale	negative	absent	absent	absent	D. filarial and P. rufescens
501	low land	ovine	male	adult	poor	semi-intesnsive	wet	damot gale	negative	absent	absent	absent	D. filarial and P. rufescens
502	low land	ovine	female	adult	poor	extensive	wet	damot gale	negative	absent	absent	absent	D. filarial and P. rufescens
503	low land	ovine	female	adult	medium	semi-intesnsive	dry	damot gale	negative	absent	absent	absent	D. filarial and P. rufescens
504	low land	ovine	female	adult	medium	extensive	wet	damot gale	negative	absent	absent	absent	D. filarial and P. rufescens
505	low land	ovine	male	adult	good	semi-intesnsive	wet	damot gale	negative	absent	absent	absent	D. filarial and P. rufescens
506	low land	ovine	female	adult	poor	extensive	dry	damot gale	negative	absent	absent	absent	D. filarial and P. rufescens
507	low land	ovine	female	adult	poor	semi-intesnsive	wet	humbo	positive	present	absent	absent	D. filarial and P. rufescens
508	hig land	ovine	female	adult	poor	semi-intesnsive	dry	humbo	positive	present	absent	absent	D. filarial and P. rufescens
509	hig land	caprine	male	young	good	extensive	wet	humbo	negative	absent	absent	absent	D. filarial and P. rufescens
510	hig land	caprine	male	young	good	semi-intesnsive	wet	humbo	negative	absent	absent	absent	D. filarial and P. rufescens
511	hig land	caprine	male	adult	poor	extensive	dry	humbo	positive	present	absent	absent	D. filarial and P. rufescens
512	hig land	caprine	male	adult	poor	semi-intesnsive	wet	humbo	negative	absent	absent	absent	D. filarial and P. rufescens
513	hig land	caprine	male	young	medium	extensive	dry	humbo	negative	absent	absent	absent	D. filarial and P. rufescens
514	hig land	caprine	female	young	medium	semi-intesnsive	wet	humbo	negative	absent	absent	absent	D. filarial and P. rufescens
515	hig land	caprine	female	adult	good	extensive	dry	humbo	negative	absent	absent	absent	D. filarial and P. rufescens
516	hig land	caprine	female	adult	poor	semi-intesnsive	wet	humbo	positive	present	absent	absent	D. filarial and P. rufescens
517	hig land	caprine	female	adult	poor	extensive	dry	humbo	negative	absent	absent	absent	D. filarial and P. rufescens
518	hig land	caprine	male	young	medium	semi-intesnsive	wet	humbo	negative	absent	absent	absent	D. filarial and P. rufescens
519	hig land	caprine	male	adult	medium	extensive	dry	humbo	negative	absent	absent	absent	D. filarial and P. rufescens
520	hig land	caprine	female	young	medium	semi-intesnsive	wet	humbo	positive	present	absent	absent	D. filarial and P. rufescens
521	hig land	caprine	female	adult	poor	extensive	dry	humbo	negative	absent	absent	absent	D. filarial and P. rufescens
522	hig land	caprine	female	adult	good	semi-intesnsive	wet	humbo	negative	absent	absent	absent	D. filarial and P. rufescens
523	hig land	caprine	male	young	good	extensive	dry	humbo	negative	absent	absent	absent	D. filarial and P. rufescens
524	hig land	caprine	male	young	good	semi-intesnsive	wet	humbo	negative	absent	absent	absent	D. filarial and P. rufescens
525	hig land	caprine	female	adult	medium	semi-intesnsive	dry	humbo	positive	present	absent	absent	D. filarial and P. rufescens
526	hig land	caprine	female	adult	medium	semi-intesnsive	wet	humbo	negative	absent	absent	absent	D. filarial and P. rufescens
527	hig land	caprine	male	adult	poor	extensive	dry	humbo	negative	absent	absent	absent	D. filarial and P. rufescens
528	hig land	caprine	female	adult	medium	extensive	wet	humbo	negative	absent	absent	absent	D. filarial and P. rufescens
529	hig land	caprine	female	adult	medium	semi-intesnsive	dry	humbo	positive	present	absent	absent	D. filarial and P. rufescens
530	hig land	ovine	female	young	poor	extensive	wet	humbo	negative	absent	absent	absent	D. filarial and P. rufescens
531	hig land	ovine	male	young	good	semi-intesnsive	wet	humbo	positive	present	absent	absent	D. filarial and P. rufescens
532	hig land	ovine	male	adult	medium	semi-intesnsive	dry	humbo	positive	present	absent	absent	D. filarial and P. rufescens
533	hig land	ovine	female	adult	poor	extensive	wet	humbo	negative	absent	absent	absent	D. filarial and P. rufescens
534	hig land	ovine	female	adult	good	semi-intesnsive	dry	humbo	negative	absent	absent	absent	D. filarial and P. rufescens
535	hig land	ovine	female	adult	medium	semi-intesnsive	wet	humbo	negative	absent	absent	absent	D. filarial and P. rufescens
536	hig land	ovine	male	young	good	extensive	dry	humbo	positive	present	absent	absent	D. filarial and P. rufescens
537	hig land	ovine	male	adult	poor	semi-intesnsive	wet	humbo	negative	absent	absent	absent	D. filarial and P. rufescens
538	hig land	ovine	female	young	medium	semi-intesnsive	dry	humbo	negative	absent	absent	absent	D. filarial and P. rufescens
539	hig land	ovine	female	adult	medium	extensive	wet	humbo	positive	present	absent	absent	D. filarial and P. rufescens
540	hig land	caprine	female	adult	good	semi-intesnsive	dry	humbo	negative	absent	absent	absent	D. filarial and P. rufescens
541	hig land	caprine	female	young	good	semi-intesnsive	wet	humbo	negative	absent	absent	absent	D. filarial and P. rufescens
542	hig land	caprine	male	adult	good	semi-intesnsive	dry	humbo	positive	present	absent	absent	D. filarial and P. rufescens
543	hig land	caprine	female	adult	poor	semi-intesnsive	wet	humbo	negative	absent	absent	absent	D. filarial and P. rufescens
544	hig land	caprine	male	young	medium	semi-intesnsive	dry	humbo	negative	absent	absent	absent	D. filarial and P. rufescens
545	hig land	caprine	female	adult	good	extensive	wet	humbo	negative	absent	absent	absent	D. filarial and P. rufescens
546	hig land	caprine	female	adult	poor	semi-intesnsive	dry	humbo	positive	present	absent	absent	D. filarial and P. rufescens
547	low land	caprine	male	young	medium	extensive	wet	humbo	negative	absent	absent	absent	D. filarial and P. rufescens
548	low land	caprine	male	adult	medium	semi-intesnsive	dry	humbo	negative	absent	absent	absent	D. filarial and P. rufescens
549	low land	caprine	female	adult	poor	extensive	wet	humbo	negative	absent	absent	absent	D. filarial and P. rufescens
550	hig land	caprine	female	young	good	semi-intesnsive	dry	humbo	positive	present	absent	absent	D. filarial and P. rufescens
551	low land	caprine	male	young	medium	semi-intesnsive	wet	humbo	negative	absent	absent	absent	D. filarial and P. rufescens
552	low land	caprine	male	adult	medium	extensive	dry	humbo	negative	absent	absent	absent	D. filarial and P. rufescens
553	hig land	caprine	female	adult	poor	semi-intesnsive	wet	humbo	positive	present	absent	absent	D. filarial and P. rufescens
554	low land	caprine	female	adult	medium	semi-intesnsive	dry	humbo	negative	absent	absent	absent	D. filarial and P. rufescens
555	low land	caprine	female	adult	good	extensive	wet	humbo	negative	absent	absent	absent	D. filarial and P. rufescens
556	low land	caprine	male	adult	poor	semi-intesnsive	dry	humbo	negative	absent	absent	absent	D. filarial and P. rufescens
557	low land	caprine	female	young	medium	extensive	wet	humbo	negative	absent	absent	absent	D. filarial and P. rufescens
558	hig land	caprine	male	young	medium	semi-intesnsive	wet	humbo	positive	present	absent	absent	D. filarial and P. rufescens
559	low land	caprine	female	adult	medium	semi-intesnsive	dry	humbo	negative	absent	absent	absent	D. filarial and P. rufescens
560	low land	caprine	female	adult	poor	semi-intesnsive	wet	humbo	negative	absent	absent	absent	D. filarial and P. rufescens
561	hig land	ovine	male	adult	good	semi-intesnsive	dry	humbo	positive	present	absent	absent	D. filarial and P. rufescens
562	hig land	ovine	female	adult	medium	semi-intesnsive	wet	humbo	negative	absent	absent	absent	D. filarial and P. rufescens
563	hig land	ovine	female	adult	medium	semi-intesnsive	dry	humbo	positive	present	absent	absent	D. filarial and P. rufescens
564	low land	ovine	male	young	poor	extensive	wet	humbo	negative	absent	absent	absent	D. filarial and P. rufescens
565	low land	ovine	female	young	good	semi-intesnsive	dry	humbo	negative	absent	absent	absent	D. filarial and P. rufescens
566	hig land	ovine	female	adult	medium	semi-intesnsive	wet	humbo	positive	present	absent	absent	D. filarial and P. rufescens
567	low land	ovine	male	adult	poor	extensive	dry	humbo	negative	absent	absent	absent	D. filarial and P. rufescens
568	low land	ovine	female	adult	good	semi-intesnsive	wet	humbo	negative	absent	absent	absent	D. filarial and P. rufescens
569	hig land	ovine	female	adult	medium	semi-intesnsive	dry	humbo	positive	present	absent	absent	D. filarial and P. rufescens
570	hig land	ovine	female	young	poor	extensive	wet	humbo	positive	present	absent	absent	D. filarial and P. rufescens
571	mid land	caprine	male	young	good	semi-intesnsive	dry	humbo	negative	absent	absent	absent	D. filarial and P. rufescens
572	mid land	caprine	male	adult	medium	extensive	wet	humbo	negative	absent	absent	absent	D. filarial and P. rufescens
573	mid land	caprine	male	adult	medium	semi-intesnsive	dry	humbo	positive	present	absent	absent	D. filarial and P. rufescens
574	mid land	caprine	female	adult	poor	semi-intesnsive	wet	humbo	negative	absent	absent	absent	D. filarial and P. rufescens
575	mid land	caprine	female	young	medium	semi-intesnsive	wet	humbo	negative	absent	absent	absent	D. filarial and P. rufescens
576	mid land	caprine	female	young	medium	extensive	dry	humbo	negative	absent	absent	absent	D. filarial and P. rufescens
577	mid land	caprine	female	adult	good	semi-intesnsive	wet	humbo	positive	absent	absent	present	D. filarial and P. rufescens
578	mid land	caprine	male	adult	poor	semi-intesnsive	wet	humbo	negative	absent	absent	absent	D. filarial and P. rufescens
579	mid land	caprine	male	young	medium	extensive	dry	humbo	negative	absent	absent	absent	D. filarial and P. rufescens
580	mid land	caprine	female	adult	poor	semi-intesnsive	wet	humbo	positive	absent	absent	present	D. filarial and P. rufescens
581	mid land	caprine	female	adult	good	semi-intesnsive	dry	humbo	negative	absent	absent	absent	D. filarial and P. rufescens
582	mid land	caprine	female	young	poor	extensive	wet	humbo	negative	absent	absent	absent	D. filarial and P. rufescens
583	mid land	caprine	male	adult	medium	semi-intesnsive	wet	humbo	positive	absent	absent	present	D. filarial and P. rufescens
584	mid land	caprine	male	adult	medium	semi-intesnsive	dry	humbo	negative	absent	absent	absent	D. filarial and P. rufescens
585	mid land	caprine	male	adult	medium	extensive	wet	humbo	negative	absent	absent	absent	D. filarial and P. rufescens
586	mid land	caprine	female	young	medium	semi-intesnsive	wet	humbo	negative	absent	absent	absent	D. filarial and P. rufescens
587	mid land	caprine	female	young	poor	semi-intesnsive	dry	humbo	positive	absent	present	absent	D. filarial and P. rufescens
588	mid land	caprine	female	adult	good	semi-intesnsive	wet	humbo	negative	absent	absent	absent	D. filarial and P. rufescens
589	mid land	caprine	female	adult	medium	extensive	wet	humbo	negative	absent	absent	absent	D. filarial and P. rufescens
590	mid land	caprine	male	adult	medium	semi-intesnsive	dry	humbo	negative	absent	absent	absent	D. filarial and P. rufescens
591	hig land	ovine	female	adult	poor	semi-intesnsive	wet	humbo	positive	absent	absent	absent	D. filarial and P. rufescens
592	hig land	ovine	female	young	medium	extensive	wet	humbo	negative	absent	absent	absent	D. filarial and P. rufescens
593	hig land	ovine	male	young	good	semi-intesnsive	dry	humbo	positive	present	absent	absent	D. filarial and P. rufescens
594	low land	ovine	male	adult	good	semi-intesnsive	wet	humbo	negative	absent	absent	absent	D. filarial and P. rufescens
595	low land	ovine	female	adult	medium	extensive	dry	humbo	negative	absent	absent	absent	D. filarial and P. rufescens
596	hig land	ovine	female	adult	poor	semi-intesnsive	wet	humbo	positive	absent	absent	absent	D. filarial and M. capillaries
597	hig land	ovine	female	young	medium	semi-intesnsive	wet	humbo	negative	absent	absent	absent	D. filarial and P. rufescens
598	hig land	ovine	male	young	good	extensive	dry	humbo	positive	present	absent	absent	D. filarial and P. rufescens
599	low land	ovine	male	adult	medium	semi-intesnsive	wet	humbo	negative	absent	absent	absent	D. filarial and P. rufescens
600	low land	ovine	male	adult	good	semi-intesnsive	dry	humbo	negative	absent	absent	absent	D. filarial and P. rufescens
601	mid land	caprine	female	adult	medium	semi-intesnsive	wet	humbo	positive	absent	absent	absent	D. filarial and P. rufescens
602	mid land	caprine	female	young	medium	semi-intesnsive	wet	humbo	negative	absent	absent	absent	D. filarial and P. rufescens
603	mid land	caprine	female	young	poor	semi-intesnsive	dry	humbo	negative	absent	absent	absent	D. filarial and P. rufescens
604	mid land	caprine	female	adult	good	extensive	wet	humbo	negative	absent	absent	absent	D. filarial and P. rufescens
605	mid land	caprine	male	adult	medium	semi-intesnsive	wet	humbo	positive	absent	present	absent	D. filarial and P. rufescens
606	mid land	caprine	female	adult	medium	extensive	dry	humbo	negative	absent	absent	absent	D. filarial and P. rufescens
607	mid land	caprine	male	adult	poor	extensive	wet	humbo	negative	absent	absent	absent	D. filarial and P. rufescens
608	mid land	caprine	male	adult	good	semi-intesnsive	wet	humbo	negative	absent	absent	absent	D. filarial and P. rufescens
609	mid land	caprine	female	adult	medium	semi-intesnsive	dry	humbo	negative	absent	absent	absent	D. filarial and P. rufescens
610	mid land	caprine	female	young	medium	extensive	wet	humbo	negative	absent	absent	absent	D. filarial and P. rufescens
611	mid land	ovine	female	adult	poor	semi-intesnsive	wet	humbo	positive	absent	absent	absent	D. filarial and M. capillaries
612	mid land	ovine	male	adult	medium	semi-intesnsive	dry	humbo	negative	absent	absent	absent	D. filarial and P. rufescens
613	mid land	ovine	female	young	good	extensive	wet	humbo	negative	absent	absent	absent	D. filarial and P. rufescens
614	mid land	ovine	female	adult	poor	semi-intesnsive	wet	humbo	positive	absent	absent	absent	D. filarial and M. capillaries
615	mid land	ovine	male	adult	medium	semi-intesnsive	dry	humbo	negative	absent	absent	absent	D. filarial and P. rufescens
616	mid land	ovine	male	adult	good	extensive	wet	humbo	positive	absent	absent	absent	D. filarial and P. rufescens
617	mid land	ovine	female	young	poor	semi-intesnsive	wet	humbo	negative	absent	absent	absent	D. filarial and P. rufescens
618	mid land	ovine	female	adult	medium	semi-intesnsive	dry	humbo	negative	absent	absent	absent	D. filarial and P. rufescens
619	mid land	ovine	female	adult	medium	extensive	wet	humbo	positive	absent	absent	absent	D. filarial and P. rufescens
620	mid land	ovine	male	adult	medium	semi-intesnsive	wet	humbo	negative	absent	absent	absent	D. filarial and P. rufescens
621	mid land	caprine	male	young	poor	extensive	wet	humbo	positive	absent	absent	present	D. filarial and P. rufescens
622	mid land	caprine	female	adult	good	semi-intesnsive	dry	humbo	negative	absent	absent	absent	D. filarial and P. rufescens
623	mid land	caprine	female	adult	medium	semi-intesnsive	wet	humbo	negative	absent	absent	absent	D. filarial and P. rufescens
624	mid land	caprine	male	adult	medium	extensive	wet	humbo	positive	absent	absent	present	D. filarial and P. rufescens
625	mid land	caprine	male	adult	poor	semi-intesnsive	dry	humbo	negative	absent	absent	absent	D. filarial and P. rufescens
626	mid land	caprine	female	young	medium	semi-intesnsive	wet	humbo	negative	absent	absent	absent	D. filarial and P. rufescens
627	mid land	caprine	male	young	poor	extensive	wet	humbo	negative	absent	absent	absent	D. filarial and P. rufescens
628	mid land	caprine	male	young	medium	semi-intesnsive	dry	humbo	negative	absent	absent	absent	D. filarial and P. rufescens
629	mid land	caprine	male	adult	poor	semi-intesnsive	wet	humbo	positive	absent	present	absent	D. filarial and P. rufescens
630	mid land	caprine	female	adult	medium	extensive	wet	humbo	negative	absent	absent	absent	D. filarial and P. rufescens
631	mid land	caprine	female	adult	good	semi-intesnsive	dry	humbo	negative	absent	absent	absent	D. filarial and P. rufescens
632	mid land	caprine	female	adult	medium	semi-intesnsive	wet	humbo	negative	absent	absent	absent	D. filarial and P. rufescens
633	mid land	caprine	male	young	poor	extensive	wet	humbo	positive	absent	present	absent	D. filarial and P. rufescens
634	mid land	caprine	male	adult	medium	semi-intesnsive	dry	humbo	negative	absent	absent	absent	D. filarial and P. rufescens
635	low land	caprine	female	young	medium	semi-intesnsive	wet	humbo	negative	absent	absent	absent	D. filarial and P. rufescens
636	low land	caprine	female	adult	good	extensive	dry	humbo	negative	absent	absent	absent	D. filarial and P. rufescens
637	low land	caprine	male	adult	poor	semi-intesnsive	wet	humbo	negative	absent	absent	absent	D. filarial and P. rufescens
638	low land	caprine	male	adult	medium	extensive	dry	humbo	positive	absent	present	absent	D. filarial and P. rufescens
639	low land	caprine	female	young	good	semi-intesnsive	wet	humbo	negative	absent	absent	absent	D. filarial and P. rufescens
640	low land	caprine	female	adult	medium	semi-intesnsive	dry	humbo	negative	absent	absent	absent	D. filarial and P. rufescens
641	low land	caprine	female	young	poor	extensive	wet	humbo	negative	absent	absent	absent	D. filarial and P. rufescens
642	low land	caprine	male	adult	good	semi-intesnsive	dry	humbo	negative	absent	absent	absent	D. filarial and P. rufescens
643	low land	caprine	male	adult	medium	semi-intesnsive	wet	humbo	negative	absent	absent	absent	D. filarial and P. rufescens
644	low land	caprine	female	young	medium	extensive	dry	humbo	negative	absent	absent	absent	D. filarial and P. rufescens
645	low land	caprine	female	young	poor	extensive	wet	humbo	positive	absent	absent	absent	D. filarial and M. capillaries
646	low land	caprine	female	adult	good	semi-intesnsive	wet	humbo	negative	absent	absent	absent	D. filarial and P. rufescens
647	low land	caprine	female	adult	medium	semi-intesnsive	dry	humbo	negative	absent	absent	absent	D. filarial and P. rufescens
648	low land	caprine	male	adult	poor	extensive	wet	humbo	negative	absent	absent	absent	D. filarial and P. rufescens
649	low land	caprine	male	adult	medium	semi-intesnsive	dry	humbo	negative	absent	absent	absent	D. filarial and P. rufescens
650	low land	caprine	female	adult	medium	semi-intesnsive	wet	humbo	positive	absent	absent	absent	D. filarial and M. capillaries
651	low land	ovine	female	young	good	extensive	dry	humbo	positive	absent	absent	absent	D. filarial and P. rufescens
652	low land	ovine	female	young	poor	semi-intesnsive	wet	humbo	positive	absent	absent	absent	D. filarial and P. rufescens
653	low land	ovine	male	young	medium	extensive	dry	humbo	negative	absent	absent	absent	D. filarial and P. rufescens
654	low land	ovine	male	adult	medium	extensive	wet	humbo	negative	absent	absent	absent	D. filarial and P. rufescens
655	low land	ovine	male	adult	good	semi-intesnsive	wet	humbo	negative	absent	absent	absent	D. filarial and P. rufescens
656	low land	ovine	female	adult	poor	semi-intesnsive	dry	humbo	positive	absent	absent	absent	D. filarial and M. capillaries
657	low land	ovine	female	young	medium	extensive	wet	humbo	negative	absent	absent	absent	D. filarial and P. rufescens
658	low land	ovine	male	adult	medium	semi-intesnsive	dry	humbo	negative	absent	absent	absent	D. filarial and P. rufescens
659	low land	ovine	female	young	poor	semi-intesnsive	wet	humbo	positive	absent	absent	absent	D. filarial and P. rufescens
660	low land	ovine	male	adult	medium	extensive	dry	humbo	negative	absent	absent	absent	D. filarial and P. rufescens
661	low land	caprine	female	adult	good	semi-intesnsive	wet	humbo	negative	absent	absent	absent	D. filarial and P. rufescens
662	low land	caprine	male	young	poor	semi-intesnsive	dry	humbo	negative	absent	absent	absent	D. filarial and P. rufescens
663	low land	caprine	male	young	medium	extensive	wet	humbo	negative	absent	absent	absent	D. filarial and P. rufescens
664	low land	caprine	female	adult	medium	semi-intesnsive	dry	humbo	positive	absent	present	absent	D. filarial and P. rufescens
665	low land	caprine	female	adult	good	semi-intesnsive	wet	humbo	negative	absent	absent	absent	D. filarial and P. rufescens
666	low land	caprine	male	adult	poor	extensive	dry	humbo	negative	absent	absent	absent	D. filarial and P. rufescens
667	low land	caprine	male	adult	medium	semi-intesnsive	wet	humbo	negative	absent	absent	absent	D. filarial and P. rufescens
668	low land	caprine	female	young	medium	semi-intesnsive	wet	humbo	negative	absent	absent	absent	D. filarial and P. rufescens
669	low land	caprine	female	young	good	extensive	dry	humbo	positive	absent	present	absent	D. filarial and P. rufescens
670	low land	caprine	male	adult	poor	semi-intesnsive	wet	humbo	negative	absent	absent	absent	D. filarial and P. rufescens
671	low land	caprine	male	adult	medium	semi-intesnsive	dry	humbo	negative	absent	absent	absent	D. filarial and P. rufescens
672	low land	caprine	female	adult	poor	extensive	wet	humbo	negative	absent	absent	absent	D. filarial and P. rufescens
673	low land	caprine	female	adult	good	semi-intesnsive	dry	humbo	negative	absent	absent	absent	D. filarial and P. rufescens
674	low land	caprine	male	young	poor	semi-intesnsive	wet	humbo	negative	absent	absent	absent	D. filarial and P. rufescens
675	low land	caprine	male	young	medium	extensive	dry	humbo	positive	absent	present	absent	D. filarial and P. rufescens
676	low land	caprine	female	adult	medium	semi-intesnsive	wet	humbo	negative	absent	absent	absent	D. filarial and P. rufescens
677	low land	caprine	female	adult	good	semi-intesnsive	wet	humbo	negative	absent	absent	absent	D. filarial and P. rufescens
678	low land	caprine	female	young	poor	extensive	dry	humbo	negative	absent	absent	absent	D. filarial and P. rufescens
679	low land	caprine	female	young	medium	semi-intesnsive	wet	humbo	negative	absent	absent	absent	D. filarial and P. rufescens
680	low land	caprine	male	adult	good	semi-intesnsive	wet	humbo	negative	absent	absent	absent	D. filarial and P. rufescens
681	low land	ovine	male	adult	poor	extensive	dry	humbo	positive	absent	absent	absent	D. filarial and M. capillaries
682	low land	ovine	female	adult	medium	semi-intesnsive	wet	humbo	negative	absent	absent	absent	D. filarial and P. rufescens
683	low land	ovine	female	young	medium	semi-intesnsive	wet	humbo	positive	absent	absent	absent	D. filarial and P. rufescens
684	low land	ovine	male	young	poor	extensive	dry	humbo	negative	absent	absent	absent	D. filarial and P. rufescens
685	low land	ovine	male	adult	good	semi-intesnsive	wet	humbo	negative	absent	absent	absent	D. filarial and P. rufescens
686	low land	ovine	female	adult	medium	semi-intesnsive	wet	humbo	negative	absent	absent	absent	D. filarial and P. rufescens
687	low land	ovine	female	adult	poor	extensive	dry	humbo	positive	absent	absent	absent	D. filarial and P. rufescens
688	low land	ovine	male	adult	good	semi-intesnsive	wet	humbo	negative	absent	absent	absent	D. filarial and P. rufescens
689	low land	ovine	male	adult	poor	semi-intesnsive	wet	humbo	negative	absent	absent	absent	D. filarial and P. rufescens
690	low land	ovine	female	adult	medium	extensive	dry	humbo	positive	absent	absent	absent	D. filarial and P. rufescens
691	low land	caprine	female	young	poor	semi-intesnsive	wet	humbo	negative	absent	absent	absent	D. filarial and P. rufescens
692	low land	caprine	male	adult	medium	semi-intesnsive	wet	humbo	negative	absent	absent	absent	D. filarial and P. rufescens
693	low land	caprine	male	young	good	extensive	dry	humbo	negative	absent	absent	absent	D. filarial and P. rufescens
694	low land	caprine	female	adult	good	semi-intesnsive	wet	humbo	negative	absent	absent	absent	D. filarial and P. rufescens
695	low land	caprine	female	adult	medium	semi-intesnsive	wet	humbo	negative	absent	absent	absent	D. filarial and P. rufescens
696	low land	caprine	female	young	poor	extensive	dry	humbo	negative	absent	absent	absent	D. filarial and P. rufescens
697	low land	caprine	female	adult	medium	semi-intesnsive	wet	humbo	negative	absent	absent	absent	D. filarial and P. rufescens
698	low land	caprine	male	adult	good	semi-intesnsive	dry	humbo	negative	absent	absent	absent	D. filarial and P. rufescens
699	low land	caprine	male	young	poor	extensive	wet	humbo	positive	absent	present	absent	D. filarial and P. rufescens
700	low land	caprine	female	adult	medium	semi-intesnsive	wet	humbo	negative	absent	absent	absent	D. filarial and P. rufescens
701	low land	caprine	female	adult	medium	semi-intesnsive	dry	humbo	negative	absent	absent	absent	D. filarial and P. rufescens
702	low land	caprine	female	young	poor	extensive	wet	humbo	negative	absent	absent	absent	D. filarial and P. rufescens
703	low land	caprine	male	adult	medium	semi-intesnsive	wet	humbo	negative	absent	absent	absent	D. filarial and P. rufescens
704	low land	caprine	male	adult	good	semi-intesnsive	dry	humbo	negative	absent	absent	absent	D. filarial and P. rufescens
705	low land	caprine	female	young	poor	semi-intesnsive	wet	humbo	negative	absent	absent	absent	D. filarial and P. rufescens
706	low land	caprine	female	adult	medium	extensive	wet	humbo	negative	absent	absent	absent	D. filarial and P. rufescens
707	low land	caprine	male	young	poor	semi-intesnsive	dry	humbo	positive	absent	present	absent	D. filarial and P. rufescens
708	low land	caprine	male	young	medium	extensive	wet	humbo	negative	absent	absent	absent	D. filarial and P. rufescens
709	low land	caprine	female	adult	poor	semi-intesnsive	wet	humbo	negative	absent	absent	absent	D. filarial and P. rufescens
710	low land	caprine	female	adult	medium	semi-intesnsive	dry	humbo	negative	absent	absent	absent	D. filarial and P. rufescens
711	low land	ovine	male	young	good	extensive	wet	humbo	negative	absent	absent	absent	D. filarial and P. rufescens
712	low land	ovine	male	young	poor	semi-intesnsive	wet	humbo	positive	absent	absent	absent	D. filarial and M. capillaries
713	low land	ovine	female	adult	medium	semi-intesnsive	dry	humbo	negative	absent	absent	absent	D. filarial and P. rufescens
714	low land	ovine	female	adult	medium	extensive	wet	humbo	negative	absent	absent	absent	D. filarial and P. rufescens
715	low land	ovine	male	adult	good	semi-intesnsive	wet	humbo	negative	absent	absent	absent	D. filarial and P. rufescens
716	low land	ovine	male	adult	good	extensive	dry	humbo	negative	absent	absent	absent	D. filarial and P. rufescens
717	low land	ovine	female	young	medium	semi-intesnsive	wet	humbo	negative	absent	absent	absent	D. filarial and P. rufescens
718	low land	ovine	female	young	poor	extensive	wet	humbo	negative	absent	absent	absent	D. filarial and P. rufescens
719	low land	ovine	female	adult	good	semi-intesnsive	dry	humbo	positive	absent	absent	absent	D. filarial and M. capillaries
720	low land	ovine	male	adult	medium	semi-intesnsive	wet	humbo	negative	absent	absent	absent	D. filarial and P. rufescens
721	low land	caprine	male	adult	poor	extensive	wet	humbo	negative	absent	absent	absent	D. filarial and P. rufescens
722	low land	caprine	male	young	good	semi-intesnsive	dry	humbo	negative	absent	absent	absent	D. filarial and P. rufescens
723	low land	caprine	female	adult	medium	semi-intesnsive	wet	humbo	negative	absent	absent	absent	D. filarial and P. rufescens
724	low land	caprine	female	young	poor	extensive	dry	humbo	negative	absent	absent	absent	D. filarial and P. rufescens
725	low land	caprine	female	young	medium	semi-intesnsive	wet	humbo	negative	absent	absent	absent	D. filarial and P. rufescens
726	low land	caprine	male	young	good	semi-intesnsive	dry	humbo	positive	absent	absent	absent	D. filarial and P. rufescens
727	low land	caprine	male	adult	poor	extensive	wet	humbo	negative	absent	absent	absent	D. filarial and P. rufescens
728	low land	caprine	female	adult	medium	semi-intesnsive	dry	humbo	negative	absent	absent	absent	D. filarial and P. rufescens
729	low land	caprine	female	adult	good	semi-intesnsive	wet	humbo	negative	absent	absent	absent	D. filarial and P. rufescens
730	low land	caprine	female	young	poor	extensive	dry	humbo	negative	absent	absent	absent	D. filarial and P. rufescens
731	low land	caprine	male	young	good	semi-intesnsive	wet	humbo	negative	absent	absent	absent	D. filarial and P. rufescens
732	low land	caprine	female	adult	good	extensive	wet	humbo	negative	absent	absent	absent	D. filarial and P. rufescens
733	low land	caprine	female	adult	poor	semi-intesnsive	dry	humbo	negative	absent	absent	absent	D. filarial and P. rufescens
734	low land	caprine	female	adult	good	semi-intesnsive	wet	humbo	positive	absent	absent	absent	D. filarial and M. capillaries
735	low land	caprine	female	young	good	extensive	wet	humbo	negative	absent	absent	absent	D. filarial and P. rufescens
736	low land	caprine	female	young	poor	semi-intesnsive	dry	humbo	negative	absent	absent	absent	D. filarial and P. rufescens
737	low land	caprine	female	adult	good	semi-intesnsive	wet	humbo	negative	absent	absent	absent	D. filarial and P. rufescens
738	low land	caprine	female	adult	poor	extensive	dry	humbo	negative	absent	absent	absent	D. filarial and P. rufescens
739	low land	caprine	female	adult	good	semi-intesnsive	wet	humbo	positive	absent	absent	absent	D. filarial and M. capillaries
740	low land	caprine	female	adult	good	semi-intesnsive	dry	humbo	negative	absent	absent	absent	D. filarial and P. rufescens
741	low land	ovine	female	adult	poor	extensive	wet	humbo	negative	absent	absent	absent	D. filarial and P. rufescens
742	low land	ovine	female	young	good	semi-intesnsive	dry	humbo	negative	absent	absent	absent	D. filarial and P. rufescens
													
													
													
													
													
													
													
													
													
													
													
													
													
													
													
													
													
